# Supplementary material
Source: PubMed Central journal article supplement (PMC5759038)
Supplement: NIHMS926910-supplement-supplement_1.pdf [file NIHMS926910-supplement-supplement_1.pdf]

**SUPPORTING TABLE 1.** Liver Cancer: Number of Males and Females (15-99 Years Old) Diagnosed 2001-2003 and 2004-2009 and Distribution by SEER Summary Stage 2000 at Diagnosis, Race, and Calendar Period of Diagnosis

| Location               | SEER Summary Stage 2000 | 2001-2003 |        |        | 2004-2009 |        |        |
|------------------------|-------------------------|-----------|--------|--------|-----------|--------|--------|
|                        |                         | All Races | Whites | Blacks | All Races | Whites | Blacks |
| <b>UNITED STATES</b>   | No. of patients         | 33,690    | 25,500 | 4225   | 92,571    | 69,374 | 13,002 |
|                        | Localized, %            | 33.4      | 33.2   | 30.4   | 41.0      | 40.9   | 38.8   |
|                        | Regional, %             | 22.4      | 21.6   | 23.6   | 24.4      | 23.8   | 25.9   |
|                        | Distant, %              | 18.4      | 18.2   | 20.4   | 17.6      | 17.4   | 19.8   |
|                        | Unknown, %              | 25.8      | 27.0   | 25.6   | 17.0      | 17.8   | 15.5   |
| <b>NORTHEAST</b>       |                         |           |        |        |           |        |        |
| <b>New England</b>     |                         |           |        |        |           |        |        |
| Connecticut (SEER)     | No. of patients         | 492       | 421    | 53     | 1411      | 1170   | 164    |
|                        | Localized, %            | 36.6      | 36.8   | 35.8   | 41.2      | 40.8   | 42.1   |
|                        | Regional, %             | 17.5      | 16.6   | 22.6   | 24.9      | 23.9   | 32.3   |
|                        | Distant, %              | 19.5      | 19.5   | 17.0   | 18.9      | 19.4   | 15.9   |
|                        | Unknown, %              | 26.4      | 27.1   | 24.5   | 15.0      | 15.9   | 9.8    |
| Massachusetts (NPCR)   | No. of patients         | 998       | 827    | 75     | 2741      | 2299   | 178    |
|                        | Localized, %            | 34.4      | 34.0   | 28.0   | 40.9      | 41.0   | 33.7   |
|                        | Regional, %             | 25.4      | 24.9   | 32.0   | 26.4      | 26.1   | 32.6   |
|                        | Distant, %              | 15.8      | 16.2   | 14.7   | 16.7      | 16.8   | 15.7   |
|                        | Unknown, %              | 24.4      | 24.9   | 25.3   | 16.0      | 16.1   | 18.0   |
| New Hampshire (NPCR)   | No. of patients         | 133       | 118    | -      | 355       | 332    | -      |
|                        | Localized, %            | 24.8      | 24.6   | -      | 35.5      | 35.5   | -      |
|                        | Regional, %             | 24.1      | 21.2   | -      | 27.9      | 28.6   | -      |
|                        | Distant, %              | 16.5      | 17.8   | -      | 17.2      | 17.8   | -      |
|                        | Unknown, %              | 34.6      | 36.4   | -      | 19.4      | 18.1   | -      |
| Rhode Island (NPCR)    | No. of patients         | 176       | 161    | 10     | 409       | 353    | 32     |
|                        | Localized, %            | 29.5      | 29.8   | 30.0   | -         | -      | -      |
|                        | Regional, %             | 29.0      | 28.6   | 40.0   | -         | -      | -      |
|                        | Distant, %              | 15.3      | 13.7   | 30.0   | -         | -      | -      |
|                        | Unknown, %              | 26.1      | 28.0   | 0.0    | -         | -      | -      |
| <b>Mid Atlantic</b>    |                         |           |        |        |           |        |        |
| New Jersey (NPCR/SEER) | No. of patients         | 1421      | 1093   | 199    | 3339      | 2587   | 488    |
|                        | Localized, %            | 30.6      | 29.1   | 33.2   | 41.6      | 41.0   | 40.8   |
|                        | Regional, %             | 19.7      | 19.7   | 21.1   | 21.2      | 21.3   | 20.7   |
|                        | Distant, %              | 20.1      | 20.4   | 21.6   | 16.4      | 16.2   | 18.0   |
|                        | Unknown, %              | 29.6      | 30.8   | 24.1   | 20.8      | 21.5   | 20.5   |
| New York (NPCR)        | No. of patients         | 3465      | 2458   | 578    | 8877      | 6052   | 1670   |
|                        | Localized, %            | 28.1      | 27.8   | 23.9   | 41.4      | 40.4   | 39.2   |
|                        | Regional, %             | 21.0      | 20.5   | 24.2   | 23.9      | 24.0   | 25.5   |
|                        | Distant, %              | 17.7      | 17.4   | 19.7   | 18.6      | 18.7   | 21.0   |
|                        | Unknown, %              | 33.2      | 34.3   | 32.2   | 16.1      | 16.9   | 14.4   |
| Pennsylvania (NPCR)    | No. of patients         | 2004      | 1569   | 322    | 5026      | 3957   | 821    |
|                        | Localized, %            | 31.2      | 31.2   | 29.2   | 42.6      | 41.7   | 43.7   |
|                        | Regional, %             | 24.5      | 25.7   | 20.8   | 26.5      | 26.3   | 28.7   |
|                        | Distant, %              | 20.5      | 20.0   | 23.6   | 18.2      | 18.7   | 16.9   |
|                        | Unknown, %              | 23.8      | 23.0   | 26.4   | 12.8      | 13.3   | 10.6   |
| <b>SOUTH</b>           |                         |           |        |        |           |        |        |
| <b>South Atlantic</b>  |                         |           |        |        |           |        |        |
| Delaware (NPCR)        | No. of patients         | 106       | 87     | 16     | 310       | 218    | 81     |
|                        | Localized, %            | 41.5      | 41.4   | 43.8   | 45.8      | 47.2   | 40.7   |
|                        | Regional, %             | 21.7      | 17.2   | 43.8   | 26.1      | 25.7   | 27.2   |
|                        | Distant, %              | 16.0      | 17.2   | 12.5   | 19.7      | 19.3   | 22.2   |
|                        | Unknown, %              | 20.8      | 24.1   | 0.0    | 8.4       | 7.8    | 9.9    |
| Florida (NPCR)         | No. of patients         | 2721      | 2337   | 276    | 7339      | 6063   | 946    |
|                        | Localized, %            | 29.1      | 29.3   | 26.4   | 38.9      | 39.6   | 33.4   |
|                        | Regional, %             | 19.8      | 19.3   | 25.4   | 23.3      | 23.0   | 26.6   |
|                        | Distant, %              | 20.3      | 20.1   | 22.8   | 16.5      | 16.0   | 20.0   |
|                        | Unknown, %              | 30.8      | 31.4   | 25.4   | 21.3      | 21.3   | 20.0   |
| Georgia (NPCR/SEER)    | No. of patients         | 813       | 540    | 217    | 2698      | 1798   | 764    |
|                        | Localized, %            | 35.9      | 36.3   | 33.6   | 43.7      | 44.4   | 42.3   |
|                        | Regional, %             | 21.5      | 20.4   | 24.0   | 25.8      | 25.0   | 27.7   |
|                        | Distant, %              | 19.8      | 20.6   | 19.4   | 18.9      | 17.7   | 21.9   |
|                        | Unknown, %              | 22.8      | 22.8   | 23.0   | 11.6      | 12.9   | 8.1    |

**SUPPORTING TABLE 1.** *Continued*

| Location                  | SEER Summary Stage 2000 | 2001-2003 |        |        | 2004-2009 |        |        |
|---------------------------|-------------------------|-----------|--------|--------|-----------|--------|--------|
|                           |                         | All Races | Whites | Blacks | All Races | Whites | Blacks |
| Maryland (NPCR)           | No. of patients         | 657       | 411    | 192    | 1524      | 901    | 517    |
|                           | Localized, %            | -         | -      | -      | -         | -      | -      |
|                           | Regional, %             | -         | -      | -      | -         | -      | -      |
|                           | Distant, %              | -         | -      | -      | -         | -      | -      |
|                           | Unknown, %              | -         | -      | -      | -         | -      | -      |
| North Carolina (NPCR)     | No. of patients         | 934       | 695    | 197    | 2873      | 2094   | 631    |
|                           | Localized, %            | 38.1      | 41.3   | 28.9   | 41.8      | 41.8   | 40.9   |
|                           | Regional, %             | 21.1      | 20.4   | 21.8   | 25.5      | 25.6   | 26.0   |
|                           | Distant, %              | 17.8      | 16.3   | 21.8   | 17.9      | 17.3   | 18.9   |
|                           | Unknown, %              | 23.0      | 22.0   | 27.4   | 14.8      | 15.3   | 14.3   |
| South Carolina (NPCR)     | No. of patients         | 485       | 352    | 118    | 1339      | 951    | 347    |
|                           | Localized, %            | 36.9      | 38.9   | 30.5   | 40.0      | 40.9   | 37.5   |
|                           | Regional, %             | 17.5      | 18.2   | 16.1   | 22.3      | 22.0   | 23.1   |
|                           | Distant, %              | 15.5      | 15.1   | 16.1   | 17.8      | 17.4   | 19.9   |
|                           | Unknown, %              | 30.1      | 27.8   | 37.3   | 19.9      | 19.8   | 19.6   |
| West Virginia (NPCR)      | No. of patients         | 230       | 220    | -      | 562       | 531    | 27     |
|                           | Localized, %            | 25.7      | 25.9   | -      | 35.6      | 35.6   | 33.3   |
|                           | Regional, %             | 16.1      | 16.4   | -      | 21.4      | 21.7   | 14.8   |
|                           | Distant, %              | 19.1      | 19.1   | -      | 15.1      | 14.5   | 29.6   |
|                           | Unknown, %              | 39.1      | 38.6   | -      | 27.9      | 28.2   | 22.2   |
| <b>East South Central</b> |                         |           |        |        |           |        |        |
| Alabama (NPCR)            | No. of patients         | 514       | 381    | 119    | 1408      | 1068   | 317    |
|                           | Localized, %            | 30.2      | 29.7   | 30.3   | 43.4      | 44.7   | 38.8   |
|                           | Regional, %             | 21.6      | 21.5   | 20.2   | 20.7      | 19.9   | 23.7   |
|                           | Distant, %              | 18.7      | 19.7   | 16.8   | 17.0      | 16.0   | 19.9   |
|                           | Unknown, %              | 29.6      | 29.1   | 32.8   | 18.8      | 19.4   | 17.7   |
| Kentucky (NPCR/SEER)      | No. of patients         | 466       | 418    | 41     | 1353      | 1207   | 129    |
|                           | Localized, %            | 35.8      | 35.4   | 36.6   | 43.7      | 42.8   | 50.4   |
|                           | Regional, %             | 21.2      | 20.6   | 31.7   | 23.7      | 24.3   | 17.8   |
|                           | Distant, %              | 17.2      | 17.7   | 14.6   | 18.6      | 17.9   | 24.8   |
|                           | Unknown, %              | 25.8      | 26.3   | 17.1   | 14.1      | 15.0   | 7.0    |
| Mississippi (NPCR)        | No. of patients         | 128       | 91     | 28     | 899       | 622    | 251    |
|                           | Localized, %            | 35.9      | 37.4   | 35.7   | 38.2      | 41.0   | 32.3   |
|                           | Regional, %             | 20.3      | 19.8   | 14.3   | 29.0      | 26.5   | 34.3   |
|                           | Distant, %              | 22.7      | 24.2   | 21.4   | 20.2      | 19.3   | 21.9   |
|                           | Unknown, %              | 21.1      | 18.7   | 28.6   | 12.6      | 13.2   | 11.6   |
| Tennessee (NPCR)          | No. of patients         | 177       | 149    | 22     | 1805      | 1417   | 334    |
|                           | Localized, %            | 40.7      | 42.3   | 36.4   | 46.1      | 46.4   | 42.8   |
|                           | Regional, %             | 22.6      | 24.2   | 9.1    | 22.7      | 22.4   | 23.1   |
|                           | Distant, %              | 19.2      | 16.1   | 36.4   | 16.8      | 16.7   | 19.8   |
|                           | Unknown, %              | 17.5      | 17.4   | 18.2   | 14.4      | 14.5   | 14.4   |
| <b>West South Central</b> |                         |           |        |        |           |        |        |
| Louisiana (NPCR/SEER)     | No. of patients         | 694       | 464    | 211    | 1739      | 1066   | 609    |
|                           | Localized, %            | 41.2      | 43.8   | 37.0   | 49.7      | 50.3   | 47.5   |
|                           | Regional, %             | 24.9      | 24.6   | 25.1   | 23.1      | 22.1   | 25.0   |
|                           | Distant, %              | 18.0      | 15.5   | 22.7   | 18.0      | 17.4   | 19.2   |
|                           | Unknown, %              | 15.9      | 16.2   | 15.2   | 9.3       | 10.2   | 8.4    |
| Oklahoma (NPCR)           | No. of patients         | 425       | 319    | 37     | 1280      | 979    | 85     |
|                           | Localized, %            | 28.7      | 28.5   | 18.9   | 37.3      | 39.0   | 31.8   |
|                           | Regional, %             | 15.3      | 14.4   | 16.2   | 20.0      | 19.0   | 24.7   |
|                           | Distant, %              | 21.9      | 23.2   | 24.3   | 19.8      | 19.1   | 24.7   |
|                           | Unknown, %              | 34.1      | 33.9   | 40.5   | 23.0      | 22.9   | 18.8   |
| Texas (NPCR)              | No. of patients         | 3543      | 2944   | 405    | 10,265    | 8253   | 1422   |
|                           | Localized, %            | 34.1      | 34.2   | 33.1   | 41.5      | 42.7   | 35.6   |
|                           | Regional, %             | 17.3      | 16.5   | 22.2   | 20.7      | 19.7   | 26.1   |
|                           | Distant, %              | 17.6      | 17.4   | 20.0   | 17.2      | 16.7   | 19.9   |
|                           | Unknown, %              | 31.0      | 31.8   | 24.7   | 20.6      | 20.9   | 18.4   |
| <b>MIDWEST</b>            |                         |           |        |        |           |        |        |
| <b>East North Central</b> |                         |           |        |        |           |        |        |
| Michigan (NPCR/SEER)      | No. of patients         | 1412      | 1072   | 278    | 3485      | 2559   | 755    |
|                           | Localized, %            | 30.5      | 30.1   | 31.3   | 35.0      | 35.0   | 34.8   |
|                           | Regional, %             | 19.6      | 18.9   | 21.9   | 16.2      | 16.1   | 15.8   |
|                           | Distant, %              | 20.0      | 19.1   | 24.8   | 19.3      | 18.8   | 21.5   |
|                           | Unknown, %              | 30.0      | 31.8   | 21.9   | 29.5      | 30.1   | 27.9   |

**SUPPORTING TABLE 1.** *Continued*

| Location                                 | SEER Summary Stage 2000 | 2001-2003 |        |        | 2004-2009 |        |        |
|------------------------------------------|-------------------------|-----------|--------|--------|-----------|--------|--------|
|                                          |                         | All Races | Whites | Blacks | All Races | Whites | Blacks |
| Ohio (NPCR)                              | No. of patients         | 1301      | 1036   | 215    | 3476      | 2735   | 634    |
|                                          | Localized, %            | 28.5      | 29.0   | 26.5   | 35.5      | 34.8   | 36.1   |
|                                          | Regional, %             | 17.8      | 18.0   | 17.2   | 21.9      | 20.7   | 26.7   |
|                                          | Distant, %              | 15.5      | 15.6   | 14.9   | 15.0      | 15.1   | 14.8   |
|                                          | Unknown, %              | 38.1      | 37.5   | 41.4   | 27.6      | 29.4   | 22.4   |
| Wisconsin (NPCR)                         | No. of patients         | 660       | 587    | 45     | 1661      | 1370   | 158    |
|                                          | Localized, %            | -         | -      | -      | -         | -      | -      |
|                                          | Regional, %             | -         | -      | -      | -         | -      | -      |
|                                          | Distant, %              | -         | -      | -      | -         | -      | -      |
|                                          | Unknown, %              | -         | -      | -      | -         | -      | -      |
| <b>West North Central</b><br>Iowa (SEER) | No. of patients         | 295       | 276    | -      | 861       | 795    | 28     |
|                                          | Localized, %            | 30.2      | 30.1   | -      | 36.4      | 37.0   | 32.1   |
|                                          | Regional, %             | 28.8      | 29.7   | -      | 30.0      | 29.1   | 42.9   |
|                                          | Distant, %              | 20.3      | 19.9   | -      | 20.6      | 20.0   | 25.0   |
|                                          | Unknown, %              | 20.7      | 20.3   | -      | 13.1      | 14.0   | 0.0    |
| Nebraska (NPCR)                          | No. of patients         | 243       | 217    | 11     | 595       | 513    | 44     |
|                                          | Localized, %            | 33.3      | 32.7   | 54.5   | 34.6      | 35.3   | 29.5   |
|                                          | Regional, %             | 22.2      | 21.7   | 18.2   | 31.1      | 31.0   | 31.8   |
|                                          | Distant, %              | 15.6      | 14.7   | 18.2   | 17.8      | 16.6   | 25.0   |
|                                          | Unknown, %              | 28.8      | 30.9   | 9.1    | 16.5      | 17.2   | 13.6   |
| <b>WEST</b>                              |                         |           |        |        |           |        |        |
| <b>Mountain</b>                          |                         |           |        |        |           |        |        |
| Colorado (NPCR)                          | No. of patients         | 521       | 436    | 32     | 1442      | 1255   | 74     |
|                                          | Localized, %            | 37.0      | 37.8   | 25.0   | 41.9      | 41.5   | 33.8   |
|                                          | Regional, %             | 21.9      | 20.9   | 34.4   | 25.0      | 24.5   | 27.0   |
|                                          | Distant, %              | 20.2      | 19.5   | 25.0   | 19.2      | 19.7   | 25.7   |
|                                          | Unknown, %              | 20.9      | 21.8   | 15.6   | 13.9      | 14.3   | 13.5   |
| Idaho (NPCR)                             | No. of patients         | 92        | 88     | -      | 332       | 316    | -      |
|                                          | Localized, %            | 33.7      | 33.0   | -      | 38.0      | 38.0   | -      |
|                                          | Regional, %             | 29.3      | 30.7   | -      | 26.2      | 26.9   | -      |
|                                          | Distant, %              | 18.5      | 17.0   | -      | 21.1      | 21.5   | -      |
|                                          | Unknown, %              | 18.5      | 19.3   | -      | 14.8      | 13.6   | -      |
| Montana (NPCR)                           | No. of patients         | 76        | 67     | -      | 232       | 191    | -      |
|                                          | Localized, %            | 25.0      | 23.9   | -      | 40.5      | 42.4   | -      |
|                                          | Regional, %             | 23.7      | 23.9   | -      | 31.5      | 29.8   | -      |
|                                          | Distant, %              | 10.5      | 11.9   | -      | 17.2      | 17.8   | -      |
|                                          | Unknown, %              | 40.8      | 40.3   | -      | 10.8      | 9.9    | -      |
| New Mexico (SEER)                        | No. of patients         | 332       | 293    | -      | 911       | 783    | 13     |
|                                          | Localized, %            | 42.8      | 43.3   | -      | 42.7      | 42.5   | 38.5   |
|                                          | Regional, %             | 16.3      | 14.7   | -      | 16.9      | 17.2   | 15.4   |
|                                          | Distant, %              | 19.3      | 19.8   | -      | 18.8      | 19.2   | 30.8   |
|                                          | Unknown, %              | 21.7      | 22.2   | -      | 21.6      | 21.1   | 15.4   |
| Utah (SEER)                              | No. of patients         | 139       | 117    | -      | 456       | 405    | 11     |
|                                          | Localized, %            | 46.0      | 46.2   | -      | 44.5      | 45.4   | 45.5   |
|                                          | Regional, %             | 24.5      | 21.4   | -      | 30.9      | 30.1   | 18.2   |
|                                          | Distant, %              | 15.1      | 17.1   | -      | 14.5      | 14.3   | 18.2   |
|                                          | Unknown, %              | 14.4      | 15.4   | -      | 10.1      | 10.1   | 18.2   |
| Wyoming (NPCR)                           | No. of patients         | 41        | 38     | -      | 131       | 125    | -      |
|                                          | Localized, %            | 17.1      | 18.4   | -      | 43.5      | 44.0   | -      |
|                                          | Regional, %             | 17.1      | 18.4   | -      | 22.9      | 23.2   | -      |
|                                          | Distant, %              | 14.6      | 15.8   | -      | 13.7      | 12.8   | -      |
|                                          | Unknown, %              | 51.2      | 47.4   | -      | 19.8      | 20.0   | -      |
| <b>Pacific</b>                           |                         |           |        |        |           |        |        |
| Alaska (NPCR)                            | No. of patients         | 100       | 62     | -      | 238       | 141    | 16     |
|                                          | Localized, %            | 28.0      | 22.6   | -      | 43.7      | 41.8   | 56.3   |
|                                          | Regional, %             | 22.0      | 21.0   | -      | 23.9      | 23.4   | 18.8   |
|                                          | Distant, %              | 18.0      | 16.1   | -      | 16.4      | 14.9   | 6.3    |
|                                          | Unknown, %              | 32.0      | 40.3   | -      | 16.0      | 19.9   | 18.8   |
| California (NPCR/SEER)                   | No. of patients         | 6206      | 4044   | 456    | 16,772    | 11,251 | 1285   |
|                                          | Localized, %            | 38.2      | 38.0   | 32.9   | 43.1      | 42.7   | 38.7   |
|                                          | Regional, %             | 27.4      | 26.1   | 32.2   | 28.0      | 27.4   | 31.1   |
|                                          | Distant, %              | 18.1      | 17.8   | 21.3   | 17.5      | 17.7   | 21.0   |
|                                          | Unknown, %              | 16.3      | 18.1   | 13.6   | 11.5      | 12.2   | 9.2    |

**SUPPORTING TABLE 1.** *Continued*

| Location               | SEER Summary<br>Stage 2000 | 2001-2003 |        |        | 2004-2009 |        |        |
|------------------------|----------------------------|-----------|--------|--------|-----------|--------|--------|
|                        |                            | All Races | Whites | Blacks | All Races | Whites | Blacks |
| Hawaii (SEER)          | No. of patients            | 364       | 49     | –      | 818       | 185    | 11     |
|                        | Localized, %               | 40.7      | 38.8   | –      | 41.7      | 36.2   | 18.2   |
|                        | Regional, %                | 34.3      | 36.7   | –      | 27.9      | 28.1   | 27.3   |
|                        | Distant, %                 | 19.8      | 16.3   | –      | 18.2      | 20.0   | 45.5   |
|                        | Unknown, %                 | 5.2       | 8.2    | –      | 12.2      | 15.7   | 9.1    |
| Oregon (NPCR)          | No. of patients            | 430       | 362    | –      | 1440      | 1219   | 39     |
|                        | Localized, %               | 24.9      | 24.9   | –      | 36.6      | 36.3   | 35.9   |
|                        | Regional, %                | 26.0      | 24.3   | –      | 29.7      | 28.9   | 25.6   |
|                        | Distant, %                 | 18.6      | 19.1   | –      | 18.4      | 18.5   | 15.4   |
|                        | Unknown, %                 | 30.5      | 31.8   | –      | 15.3      | 16.3   | 23.1   |
| Washington (NPCR/SEER) | No. of patients            | 896       | 701    | 34     | 2169      | 1613   | 119    |
|                        | Localized, %               | 37.9      | 37.1   | 41.2   | 38.7      | 36.9   | 48.7   |
|                        | Regional, %                | 33.4      | 31.7   | 44.1   | 31.0      | 31.1   | 31.9   |
|                        | Distant, %                 | 14.4      | 14.8   | 11.8   | 18.9      | 19.4   | 16.8   |
|                        | Unknown, %                 | 14.3      | 16.4   | 2.9    | 11.3      | 12.6   | 2.5    |

Abbreviations: NPCR, National Program of Cancer Registries; SEER, Surveillance, Epidemiology, and End Results.

Information on stage was not available for 2 states (Maryland and Wisconsin) or for Rhode Island for cases diagnosed during 2004-2009.

**SUPPORTING TABLE 2.** Liver Cancer: 1-, 3-, and 5-Year Age-Standardized Net Survival (%) for Adults (15-99 Years Old) Diagnosed 2001-2003 and 2004-2009 by Race and Calendar Period of Diagnosis

| Location               | Years | 2001-2003 |           |        |           |        |           | 2004-2009 |           |        |           |        |           |
|------------------------|-------|-----------|-----------|--------|-----------|--------|-----------|-----------|-----------|--------|-----------|--------|-----------|
|                        |       | All Races |           | Whites |           | Blacks |           | All Races |           | Whites |           | Blacks |           |
|                        |       | NS (%)    | 95% CI    | NS (%) | 95% CI    | NS (%) | 95% CI    | NS (%)    | 95% CI    | NS (%) | 95% CI    | NS (%) | 95% CI    |
| <b>UNITED STATES</b>   | 1     | 31.8      | 31.3-32.3 | 31.7   | 31.1-32.3 | 27.3   | 25.8-28.9 | 38.2      | 37.8-38.5 | 38.0   | 37.6-38.4 | 32.9   | 31.9-33.9 |
|                        | 3     | 16.2      | 15.8-16.7 | 15.7   | 15.3-16.2 | 13.2   | 11.9-14.4 | 20.5      | 20.1-20.8 | 19.9   | 19.5-20.3 | 16.5   | 15.5-17.5 |
|                        | 5     | 12.2      | 11.8-12.5 | 11.7   | 11.3-12.1 | 9.1    | 8.0-10.2  | 14.8      | 14.4-15.2 | 14.3   | 13.8-14.8 | 11.4   | 10.3-12.5 |
| <b>NORTHEAST</b>       |       |           |           |        |           |        |           |           |           |        |           |        |           |
| <b>New England</b>     |       |           |           |        |           |        |           |           |           |        |           |        |           |
| Connecticut (SEER)     | 1     | 35.4      | 31.0-39.8 | 36.6   | 31.8-41.4 | 30.5   | 18.1-42.9 | 42.8      | 40.0-45.6 | 42.7   | 39.7-45.8 | 43.9   | 35.0-52.9 |
|                        | 3     | 17.4      | 13.9-20.9 | 18.3   | 14.4-22.3 | 17.3   | 6.9-27.7  | 22.3      | 19.6-25.1 | 22.7   | 19.6-25.8 | 20.4   | 12.2-28.7 |
|                        | 5     | 12.4      | 9.2-15.5  | 12.8   | 9.4-16.2  | 13.5   | 3.4-23.5  | 14.5      | 11.4-17.7 | 14.9   | 11.4-18.5 | 16.1   | 7.7-24.4  |
| Massachusetts (NPCR)   | 1     | 36.4      | 33.3-39.4 | 35.3   | 32.0-38.7 | 34.2   | 23.3-45.0 | 43.0      | 40.9-45.0 | 41.7   | 39.5-44.0 | 41.8   | 33.1-50.5 |
|                        | 3     | 17.9      | 15.4-20.3 | 16.1   | 13.5-18.7 | 16.8   | 8.2-25.3  | 24.2      | 22.1-26.4 | 21.8   | 19.5-24.1 | 27.5   | 18.2-36.8 |
|                        | 5     | 14.0      | 11.7-16.4 | 13.1   | 10.6-15.5 | 10.3   | 3.4-17.2  | 15.6      | 13.0-18.2 | 13.6   | 10.9-16.4 | 20.3   | 13.0-27.6 |
| New Hampshire (NPCR)   | 1     | 32.4      | 24.9-39.8 | 29.6   | 21.9-37.3 |        |           | 34.9      | 29.6-40.2 | 35.5   | 30.1-41.0 |        |           |
|                        | 3     | 16.0      | 10.1-21.8 | 14.5   | 8.7-20.4  |        |           | 15.7      | 11.2-20.3 | 16.2   | 11.4-21.0 |        |           |
|                        | 5     | 12.2      | 6.9-17.5  | 10.9   | 5.7-16.1  |        |           | 12.5      | 8.6-16.4  | 12.4   | 8.3-16.4  |        |           |
| Rhode Island (NPCR)    | 1     | 30.3      | 23.6-37.0 | 29.6   | 23.1-36.2 | 40.7   | 12.4-69.0 | 36.1      | 30.9-41.2 | 34.9   | 29.7-40.0 | 51.6   | 34.0-69.3 |
|                        | 3     | 16.9      | 11.3-22.5 | 16.4   | 10.9-21.9 | 20.6   | 0.0-42.9  | 16.8      | 12.3-21.3 | 14.4   | 10.2-18.7 | 28.5   | 10.6-46.4 |
|                        | 5     | 12.8      | 7.7-17.8  | 11.7   | 6.8-16.6  | 20.6   | 0.0-42.9  | 10.7      | 6.8-14.7  | 9.9    | 6.1-13.6  | 14.3   | 0.0-37.3  |
| <b>Mid Atlantic</b>    |       |           |           |        |           |        |           |           |           |        |           |        |           |
| New Jersey (NPCR/SEER) | 1     | 33.6      | 31.1-36.1 | 32.7   | 29.9-35.5 | 29.9   | 23.3-36.6 | 41.1      | 39.3-43.0 | 42.5   | 40.5-44.6 | 33.3   | 28.2-38.5 |
|                        | 3     | 17.9      | 15.8-20.0 | 17.6   | 15.2-20.0 | 10.3   | 6.3-14.3  | 20.2      | 18.5-22.0 | 20.8   | 18.8-22.8 | 15.0   | 10.1-19.9 |
|                        | 5     | 12.6      | 10.7-14.4 | 12.3   | 10.2-14.4 | 6.9    | 3.8-10.0  | 14.8      | 12.8-16.8 | 15.4   | 13.1-17.6 | 8.8    | 4.2-13.4  |
| New York (NPCR)        | 1     | 36.5      | 34.9-38.2 | 35.3   | 33.3-37.2 | 32.1   | 27.8-36.4 | 43.7      | 42.6-44.8 | 42.4   | 41.0-43.7 | 40.3   | 37.5-43.1 |
|                        | 3     | 20.8      | 19.4-22.2 | 19.0   | 17.3-20.6 | 17.5   | 13.9-21.0 | 25.9      | 24.8-27.1 | 23.2   | 20.4-25.1 | 23.2   | 20.4-26.0 |
|                        | 5     | 16.8      | 15.5-18.2 | 14.6   | 13.1-16.2 | 13.1   | 9.9-16.4  | 20.4      | 19.1-21.7 | 18.2   | 16.6-19.8 | 16.5   | 13.5-19.5 |
| Pennsylvania (NPCR)    | 1     | 32.1      | 29.9-34.2 | 32.7   | 30.2-35.1 | 29.4   | 23.7-35.1 | 39.8      | 38.3-41.3 | 39.5   | 37.8-41.2 | 39.0   | 34.6-43.4 |
|                        | 3     | 17.0      | 15.2-18.7 | 17.0   | 14.9-19.0 | 13.3   | 9.0-17.6  | 20.1      | 18.7-21.6 | 20.0   | 18.4-21.7 | 14.3   | 11.2-17.5 |
|                        | 5     | 12.3      | 10.7-13.9 | 12.2   | 10.4-14.0 | 7.9    | 4.8-11.1  | 15.1      | 13.5-16.8 | 14.7   | 12.8-16.5 | 13.4   | 10.2-16.5 |
| <b>SOUTH</b>           |       |           |           |        |           |        |           |           |           |        |           |        |           |
| <b>South Atlantic</b>  |       |           |           |        |           |        |           |           |           |        |           |        |           |
| Delaware (NPCR)        | 1     | 35.2      | 26.4-44.0 | 35.5   | 26.0-45.0 | 38.0   | 15.0-61.0 | 38.7      | 32.5-44.8 | 40.5   | 33.6-47.4 | 41.2   | 30.1-52.2 |
|                        | 3     | 19.6      | 12.3-26.8 | 20.8   | 12.8-28.7 | 13.5   | 0.0-28.5  | 23.1      | 16.9-29.2 | 21.9   | 15.2-28.7 | 30.6   | 19.4-41.8 |
|                        | 5     | 12.1      | 5.8-18.3  | 13.3   | 6.3-20.3  | 7.6    | 0.0-18.9  | 14.5      | 8.0-21.1  | 13.5   | 7.1-19.9  | 16.8   | 3.0-30.5  |
| Florida (NPCR)         | 1     | 33.8      | 32.0-35.6 | 34.6   | 32.6-36.6 | 26.2   | 20.4-32.0 | 41.3      | 40.1-42.5 | 42.1   | 40.7-43.5 | 33.1   | 29.4-36.7 |
|                        | 3     | 18.5      | 16.9-20.0 | 18.4   | 16.7-20.1 | 17.3   | 12.0-22.6 | 24.8      | 23.5-26.0 | 25.1   | 23.7-26.5 | 18.9   | 15.5-22.3 |
|                        | 5     | 14.8      | 13.3-16.2 | 14.5   | 12.9-16.1 | 14.3   | 9.0-19.6  | 20.8      | 19.3-22.4 | 20.8   | 19.1-22.6 | 17.4   | 13.7-21.1 |
| Georgia (NPCR/SEER)    | 1     | 25.6      | 22.5-28.8 | 25.7   | 21.9-29.5 | 23.7   | 17.5-29.9 | 35.0      | 32.9-37.1 | 36.1   | 33.6-38.5 | 31.6   | 27.2-36.0 |
|                        | 3     | 11.4      | 9.1-13.7  | 11.7   | 8.9-14.5  | 8.9    | 4.8-12.9  | 17.7      | 15.8-19.7 | 18.5   | 16.1-20.8 | 15.6   | 11.5-19.8 |
|                        | 5     | 7.6       | 5.6-9.6   | 8.2    | 5.7-10.6  | 4.5    | 1.7-7.2   | 12.5      | 10.4-14.6 | 13.3   | 10.8-15.7 | 10.9   | 6.3-15.4  |
| Maryland (NPCR)        | 1     | 26.9      | 23.4-30.4 | 28.8   | 24.3-33.4 | 22.1   | 16.1-28.2 | 35.5      | 31.9-37.1 | 35.5   | 32.1-38.8 | 29.7   | 24.9-34.5 |
|                        | 3     | 13.7      | 10.9-16.5 | 12.6   | 9.3-15.9  | 13.7   | 8.5-18.8  | 16.9      | 14.5-19.4 | 17.0   | 14.0-19.9 | 12.4   | 8.5-16.2  |
|                        | 5     | 10.7      | 8.1-13.3  | 9.7    | 6.7-12.7  | 10.8   | 6.1-15.5  | 13.4      | 10.8-16.0 | 13.5   | 10.6-16.5 | 8.9    | 5.0-12.7  |
| North Carolina (NPCR)  | 1     | 25.0      | 22.2-27.8 | 26.8   | 23.4-30.1 | 16.8   | 11.7-21.8 | 35.4      | 33.4-37.4 | 36.9   | 34.5-39.2 | 28.6   | 23.9-33.3 |
|                        | 3     | 13.8      | 11.5-16.1 | 14.3   | 11.6-17.0 | 8.8    | 5.2-12.3  | 17.4      | 15.4-19.3 | 18.9   | 16.6-21.2 | 12.0   | 7.9-16.5  |
|                        | 5     | 10.2      | 8.1-12.4  | 10.7   | 8.2-13.2  | 5.7    | 2.8-8.6   | 12.0      | 9.9-14.1  | 13.3   | 10.8-15.9 | 5.9    | 2.5-9.3   |

**SUPPORTING TABLE 2. Continued**

| Location                                    | Years | 2001-2003 |           |          |           |          |           | 2004-2009 |           |          |           |           |           |
|---------------------------------------------|-------|-----------|-----------|----------|-----------|----------|-----------|-----------|-----------|----------|-----------|-----------|-----------|
|                                             |       | All Races |           | Whites   |           | Blacks   |           | All Races |           | Whites   |           | Blacks    |           |
|                                             |       | NS (%)    | 95% CI    | NS (%)   | 95% CI    | NS (%)   | 95% CI    | NS (%)    | 95% CI    | NS (%)   | 95% CI    | NS (%)    | 95% CI    |
| South Carolina (NPCR)                       | 1     | 27.6      | 23.6-31.6 | 28.8     | 24.2-33.5 | 29.9     | 20.8-39.0 | 30.1      | 27.4-32.9 | 31.7     | 28.4-35.0 | 23.4      | 17.9-28.8 |
|                                             | 3     | 14.5      | 11.2-17.7 | 15.4     | 11.6-19.2 | 16.0     | 8.1-23.8  | 13.3      | 10.7-15.9 | 15.7     | 12.5-18.8 | 6.8       | 3.4-10.3  |
|                                             | 5     | 10.0      | 7.2-12.7  | 11.6     | 8.2-15.1  | 6.7      | 2.2-11.1  | 10.4      | 7.7-13.1  | 11.9     | 8.5-15.2  | 6.5       | 2.5-10.4  |
|                                             | 1     | 23.5      | 17.9-29.1 | 23.8     | 18.1-29.5 |          |           | 30.1      | 26.0-34.3 | 30.2     | 25.8-34.5 | 31.7      | 12.8-50.7 |
|                                             | 3     | 9.1       | 5.4-12.9  | 9.6      | 5.7-13.5  |          |           | 16.3      | 12.2-20.3 | 15.9     | 11.8-20.0 | 8.7       | 0.0-20.8  |
| 5                                           | 6.3   | 3.1-9.5   | 6.6       | 3.3-10.0 |           |          | 9.2       | 5.4-13.1  | 7.9       | 4.5-11.4 | 9.0       | 0.0-21.3  |           |
| East South Central<br>Alabama (NPCR)        | 1     | 24.8      | 21.0-28.6 | 25.0     | 20.7-29.4 | 24.3     | 15.6-33.0 | 31.4      | 28.7-34.1 | 32.5     | 29.3-35.7 | 29.3      | 23.5-35.2 |
|                                             | 3     | 11.5      | 8.6-14.4  | 10.6     | 7.5-13.7  | 12.8     | 6.1-19.4  | 16.5      | 13.9-19.0 | 18.9     | 15.9-21.8 | 11.9      | 7.0-16.8  |
|                                             | 5     | 8.3       | 5.6-10.9  | 7.3      | 4.5-10.0  | 7.8      | 3.3-12.3  | 9.8       | 7.3-12.3  | 11.4     | 8.2-14.6  | 4.5       | 1.4-7.7   |
|                                             | 1     | 30.6      | 26.3-34.9 | 30.4     | 25.9-34.9 | 35.2     | 20.7-49.6 | 32.5      | 29.8-35.2 | 32.6     | 29.8-35.5 | 36.6      | 27.7-45.5 |
|                                             | 3     | 13.7      | 10.5-17.0 | 13.9     | 10.5-17.3 | 14.2     | 3.6-24.8  | 18.4      | 15.8-21.1 | 18.3     | 15.6-21.1 | 15.6      | 7.1-24.2  |
| 5                                           | 10.3  | 7.4-13.2  | 10.3      | 7.3-13.3 | 11.9      | 1.8-21.9 | 11.2      | 8.5-14.0  | 11.6      | 8.6-14.5 | 9.8       | 1.8-17.8  |           |
| Mississippi (NPCR)                          | 1     | 24.6      | 17.2-32.0 | 28.2     | 19.9-36.5 | 18.2     | 4.5-31.9  | 31.2      | 27.8-34.6 | 32.5     | 28.4-36.6 | 25.7      | 19.4-32.1 |
|                                             | 3     | 13.8      | 7.8-19.9  | 16.9     | 9.7-24.1  | 3.7      | 0.0-9.3   | 16.1      | 12.9-19.2 | 17.3     | 13.5-21.0 | 16.8      | 10.5-23.1 |
|                                             | 5     | 7.1       | 2.6-11.6  | 8.0      | 2.8-13.2  | 3.7      | 0.0-9.3   | 11.3      | 8.0-14.6  | 13.5     | 9.6-17.4  | 8.6       | 3.6-13.5  |
|                                             | 1     | 26.9      | 20.7-33.2 | 28.0     | 21.4-34.6 | 23.2     | 6.5-40.0  | 35.1      | 32.5-37.7 | 35.0     | 32.1-37.8 | 32.3      | 25.9-38.8 |
|                                             | 3     | 11.8      | 7.8-15.9  | 14.0     | 9.3-18.6  | 4.8      | 0.0-12.1  | 17.0      | 14.6-19.4 | 16.2     | 13.6-18.8 | 18.3      | 12.2-24.4 |
| 5                                           | 8.2   | 4.6-11.7  | 10.0      | 5.9-14.1 | 0.0       |          | 11.5      | 9.0-13.9  | 10.7      | 8.2-13.2 | 12.0      | 5.9-18.1  |           |
| West South Central<br>Louisiana (NPCR/SEER) | 1     | 26.4      | 23.1-29.8 | 29.5     | 25.3-33.6 | 21.7     | 15.6-27.7 | 32.6      | 30.1-35.1 | 34.9     | 31.7-38.1 | 27.8      | 23.4-32.3 |
|                                             | 3     | 11.5      | 9.1-13.9  | 15.0     | 11.7-18.2 | 6.2      | 3.0-9.4   | 15.7      | 13.4-18.0 | 18.3     | 15.3-21.3 | 10.7      | 7.1-14.3  |
|                                             | 5     | 9.1       | 6.8-11.4  | 11.9     | 8.9-15.0  | 5.0      | 2.1-7.9   | 9.3       | 7.1-11.6  | 11.1     | 8.1-14.0  | 6.8       | 3.4-10.2  |
|                                             | 1     | 26.3      | 22.1-30.6 | 27.4     | 22.4-32.3 | 27.7     | 13.5-42.0 | 31.5      | 28.7-34.3 | 32.6     | 29.3-35.8 | 36.1      | 24.7-47.6 |
|                                             | 3     | 11.9      | 8.7-15.1  | 11.3     | 7.6-15.0  | 18.2     | 5.8-30.5  | 16.2      | 13.6-18.9 | 15.7     | 12.7-18.6 | 23.3      | 12.9-33.7 |
| 5                                           | 8.1   | 5.4-10.8  | 6.9       | 4.0-9.8  | 13.2      | 1.8-24.5 | 10.9      | 8.0-13.9  | 11.1      | 8.1-14.2 | 23.7      | 12.6-34.8 |           |
| Texas (NPCR)                                | 1     | 33.2      | 31.6-34.8 | 33.8     | 32.0-35.6 | 28.8     | 23.3-34.4 | 37.0      | 35.9-38.0 | 37.3     | 36.1-38.5 | 29.5      | 26.4-32.7 |
|                                             | 3     | 16.4      | 15.0-17.7 | 16.3     | 14.9-17.7 | 12.7     | 8.7-16.7  | 19.7      | 18.7-20.8 | 19.8     | 18.7-21.0 | 13.1      | 10.2-16.0 |
|                                             | 5     | 12.0      | 10.9-13.2 | 11.9     | 10.6-13.2 | 10.0     | 6.0-14.1  | 14.1      | 12.9-15.3 | 14.3     | 12.9-15.6 | 8.0       | 5.8-10.3  |
|                                             | 1     | 28.2      | 25.7-30.6 | 29.5     | 26.7-32.3 | 24.5     | 18.4-30.6 | 34.3      | 32.6-36.1 | 35.6     | 33.6-37.7 | 27.6      | 23.5-31.6 |
|                                             | 3     | 15.6      | 13.6-17.6 | 15.9     | 13.6-18.2 | 14.3     | 9.3-19.4  | 19.2      | 17.5-20.9 | 19.8     | 17.8-21.8 | 16.7      | 12.8-20.6 |
| East North Central<br>Michigan (NPCR)       | 5     | 11.0      | 9.2-12.8  | 11.6     | 9.5-13.7  | 7.9      | 4.3-11.5  | 15.2      | 13.3-17.1 | 16.4     | 14.2-18.6 | 6.1       | 4.1-8.0   |
|                                             | 1     | 27.0      | 24.5-29.5 | 28.4     | 25.5-31.2 | 24.4     | 18.4-30.5 | 33.1      | 31.3-34.8 | 33.5     | 31.6-35.5 | 29.9      | 25.4-34.4 |
|                                             | 3     | 12.7      | 10.8-14.7 | 14.1     | 11.8-16.4 | 7.8      | 4.3-11.2  | 17.2      | 15.6-18.9 | 17.1     | 15.3-19.0 | 15.8      | 11.9-19.6 |
|                                             | 5     | 9.1       | 7.4-10.8  | 10.3     | 8.2-12.3  | 4.7      | 2.1-7.3   | 12.7      | 10.8-14.5 | 12.2     | 10.2-14.3 | 13.9      | 10.0-17.7 |
|                                             | 1     | 34.4      | 30.8-38.1 | 34.9     | 31.1-38.8 | 38.2     | 24.7-52.4 | 40.5      | 37.9-43.1 | 41.2     | 38.4-44.1 | 30.7      | 21.7-39.7 |
| Wisconsin (NPCR)                            | 3     | 16.8      | 13.8-19.9 | 16.8     | 13.5-20.0 | 22.8     | 10.6-35.0 | 20.4      | 17.8-22.9 | 20.9     | 18.1-23.6 | 13.4      | 7.1-19.7  |
|                                             | 5     | 13.9      | 10.9-16.9 | 14.0     | 10.8-17.2 | 13.9     | 4.0-23.9  | 11.5      | 9.0-14.1  | 12.0     | 9.2-14.7  | 10.1      | 1.6-18.6  |
|                                             | 1     | 27.1      | 22.0-32.2 | 27.5     | 22.5-32.4 |          |           | 38.7      | 35.2-42.2 | 39.7     | 36.0-43.3 | 43.5      | 25.5-61.6 |
|                                             | 3     | 14.6      | 10.6-18.7 | 15.5     | 11.5-19.5 |          |           | 19.4      | 16.0-22.9 | 20.7     | 17.1-24.4 | 19.8      | 2.2-37.3  |
|                                             | 5     | 12.0      | 8.3-15.7  | 12.6     | 8.9-16.3  |          |           | 16.5      | 12.9-20.1 | 17.7     | 13.9-21.5 | 19.9      | 2.2-37.5  |
| West North Central<br>Iowa (SEER)           | 1     | 27.1      | 22.0-32.2 | 27.5     | 22.5-32.4 |          |           | 38.7      | 35.2-42.2 | 39.7     | 36.0-43.3 | 43.5      | 25.5-61.6 |
|                                             | 3     | 14.6      | 10.6-18.7 | 15.5     | 11.5-19.5 |          |           | 19.4      | 16.0-22.9 | 20.7     | 17.1-24.4 | 19.8      | 2.2-37.3  |
|                                             | 5     | 12.0      | 8.3-15.7  | 12.6     | 8.9-16.3  |          |           | 16.5      | 12.9-20.1 | 17.7     | 13.9-21.5 | 19.9      | 2.2-37.5  |

**SUPPORTING TABLE 2. Continued**

| Location               | Years | 2001-2003   |           |             |           |             |           | 2004-2009   |           |             |           |             |           |
|------------------------|-------|-------------|-----------|-------------|-----------|-------------|-----------|-------------|-----------|-------------|-----------|-------------|-----------|
|                        |       | All Races   |           | Whites      |           | Blacks      |           | All Races   |           | Whites      |           | Blacks      |           |
|                        |       | NS (%)      | 95% CI    |
| Nebraska (NPCR)        | 1     | <b>32.9</b> | 27.0-38.8 | <b>34.3</b> | 28.0-40.6 | <b>37.0</b> | 10.9-63.1 | <b>40.3</b> | 36.2-44.3 | <b>41.4</b> | 37.1-45.8 | <b>38.8</b> | 24.0-53.5 |
|                        | 3     | <b>17.3</b> | 12.6-22.0 | <b>17.5</b> | 12.5-22.4 | <b>28.5</b> | 4.2-52.9  | <b>19.9</b> | 16.0-23.8 | <b>20.6</b> | 16.5-24.7 | <b>18.5</b> | 5.3-31.7  |
|                        | 5     | <b>12.7</b> | 8.5-16.9  | <b>12.6</b> | 8.1-17.0  | <b>23.7</b> | 0.0-48.2  | <b>14.9</b> | 11.3-18.5 | <b>15.3</b> | 11.5-19.1 | <b>19.0</b> | 5.5-32.5  |
| <b>WEST</b>            |       |             |           |             |           |             |           |             |           |             |           |             |           |
| <b>Mountain</b>        |       |             |           |             |           |             |           |             |           |             |           |             |           |
| Colorado (NPCR)        | 1     | <b>29.8</b> | 25.7-33.8 | <b>28.7</b> | 24.3-33.1 | <b>41.2</b> | 24.5-57.9 | <b>37.5</b> | 34.7-40.4 | <b>36.7</b> | 33.7-39.7 | <b>27.8</b> | 16.8-38.7 |
|                        | 3     | <b>13.9</b> | 10.9-17.0 | <b>13.8</b> | 10.5-17.1 | <b>9.8</b>  | 0.1-19.5  | <b>20.1</b> | 17.5-22.8 | <b>19.6</b> | 16.8-22.4 | <b>10.9</b> | 1.5-20.3  |
|                        | 5     | <b>11.5</b> | 8.7-14.3  | <b>11.3</b> | 8.3-14.4  | <b>6.9</b>  | 0.0-15.0  | <b>16.0</b> | 13.2-18.9 | <b>15.6</b> | 12.6-18.6 | <b>11.0</b> | 1.5-20.5  |
| Idaho (NPCR)           | 1     | <b>31.5</b> | 22.5-40.5 | <b>32.1</b> | 22.8-41.4 |             |           | <b>36.8</b> | 31.5-42.2 | <b>37.6</b> | 32.0-43.1 |             |           |
|                        | 3     | <b>18.4</b> | 11.2-25.6 | <b>18.4</b> | 10.9-25.9 |             |           | <b>19.4</b> | 14.2-24.6 | <b>20.0</b> | 14.6-25.4 |             |           |
|                        | 5     | <b>15.4</b> | 8.1-22.6  | <b>15.2</b> | 7.7-22.7  |             |           | <b>11.5</b> | 6.5-16.4  | <b>11.8</b> | 6.6-17.1  |             |           |
| Montana (NPCR)         | 1     | <b>29.1</b> | 19.1-39.1 | <b>28.6</b> | 18.1-39.1 |             |           | <b>35.9</b> | 29.6-42.2 | <b>38.2</b> | 31.3-45.1 |             |           |
|                        | 3     | <b>14.7</b> | 7.3-22.1  | <b>15.2</b> | 7.5-22.8  |             |           | <b>15.4</b> | 9.7-21.0  | <b>16.8</b> | 10.6-23.0 |             |           |
|                        | 5     | <b>13.9</b> | 5.7-22.1  | <b>13.9</b> | 5.2-22.7  |             |           | <b>11.1</b> | 5.5-16.6  | <b>11.8</b> | 5.9-17.8  |             |           |
| New Mexico (SEER)      | 1     | <b>27.2</b> | 22.4-32.0 | <b>25.9</b> | 20.9-31.0 |             |           | <b>32.0</b> | 28.6-35.3 | <b>31.5</b> | 27.9-35.1 | <b>37.2</b> | 13.1-61.4 |
|                        | 3     | <b>11.2</b> | 7.7-14.7  | <b>11.0</b> | 7.3-14.6  |             |           | <b>13.9</b> | 11.1-16.8 | <b>13.4</b> | 10.3-16.4 | <b>18.9</b> | 0.0-41.2  |
|                        | 5     | <b>7.0</b>  | 4.3-9.7   | <b>6.9</b>  | 4.0-9.7   |             |           | <b>9.7</b>  | 7.1-12.4  | <b>9.9</b>  | 7.0-12.9  |             |           |
| Utah (SEER)            | 1     | <b>28.8</b> | 21.6-36.0 | <b>29.4</b> | 22.0-36.9 |             |           | <b>38.7</b> | 33.7-43.7 | <b>40.4</b> | 35.0-45.7 | <b>27.4</b> | 3.6-51.2  |
|                        | 3     | <b>13.7</b> | 8.3-19.1  | <b>13.2</b> | 7.7-18.6  |             |           | <b>18.9</b> | 14.3-23.6 | <b>20.7</b> | 15.6-25.7 | <b>0.2</b>  | 0.0-0.5   |
|                        | 5     | <b>11.4</b> | 6.5-16.3  | <b>11.7</b> | 6.5-17.0  |             |           | <b>9.8</b>  | 5.9-13.7  | <b>10.7</b> | 6.4-15.0  |             |           |
| Wyoming (NPCR)         | 1     | <b>30.4</b> | 16.3-44.4 | <b>32.8</b> | 17.8-47.7 |             |           | <b>31.8</b> | 24.2-39.5 | <b>32.3</b> | 24.6-40.0 |             |           |
|                        | 3     | <b>5.4</b>  | 0.0-12.0  | <b>5.9</b>  | 0.0-12.9  |             |           | <b>16.0</b> | 9.9-22.1  | <b>16.3</b> | 10.1-22.5 |             |           |
|                        | 5     | <b>2.7</b>  | 0.0-7.0   | <b>3.0</b>  | 0.0-7.6   |             |           | <b>8.1</b>  | 2.2-13.9  | <b>8.1</b>  | 2.3-14.0  |             |           |
| <b>Pacific</b>         |       |             |           |             |           |             |           |             |           |             |           |             |           |
| Alaska (NPCR)          | 1     | <b>33.3</b> | 23.4-43.2 | <b>34.3</b> | 22.6-46.1 |             |           | <b>38.5</b> | 31.6-45.4 | <b>37.1</b> | 28.2-46.0 | <b>31.5</b> | 10.0-52.9 |
|                        | 3     | <b>11.7</b> | 6.2-17.2  | <b>14.7</b> | 6.0-23.4  |             |           | <b>25.9</b> | 18.9-32.8 | <b>21.4</b> | 14.3-28.5 | <b>8.1</b>  | 0.0-20.0  |
|                        | 5     | <b>9.0</b>  | 3.9-14.0  | <b>9.8</b>  | 2.6-17.0  |             |           | <b>16.6</b> | 9.4-23.7  | <b>13.1</b> | 6.9-19.4  |             |           |
| California (NPCR/SEER) | 1     | <b>32.9</b> | 31.7-34.1 | <b>31.2</b> | 29.8-32.7 | <b>25.6</b> | 21.4-29.8 | <b>39.5</b> | 38.7-40.3 | <b>37.2</b> | 36.2-38.2 | <b>31.5</b> | 28.4-34.5 |
|                        | 3     | <b>16.3</b> | 15.3-17.3 | <b>14.4</b> | 13.3-15.6 | <b>10.0</b> | 7.4-12.6  | <b>21.1</b> | 20.3-21.9 | <b>18.7</b> | 17.7-19.6 | <b>16.1</b> | 13.2-18.9 |
|                        | 5     | <b>11.4</b> | 10.6-12.3 | <b>10.1</b> | 9.1-11.1  | <b>7.2</b>  | 5.1-9.3   | <b>14.8</b> | 13.8-15.8 | <b>12.8</b> | 11.7-13.9 | <b>11.7</b> | 8.5-14.9  |
| Hawaii (SEER)          | 1     | <b>34.8</b> | 29.8-39.8 | <b>37.3</b> | 23.9-50.7 |             |           | <b>40.5</b> | 36.9-44.1 | <b>34.3</b> | 26.9-41.7 | <b>53.6</b> | 25.1-82.2 |
|                        | 3     | <b>18.2</b> | 14.2-22.3 | <b>21.2</b> | 9.7-32.7  |             |           | <b>23.1</b> | 19.4-26.8 | <b>23.0</b> | 15.9-30.1 | <b>21.4</b> | 0.0-44.1  |
|                        | 5     | <b>15.2</b> | 11.3-19.1 | <b>19.8</b> | 8.4-31.7  |             |           | <b>13.2</b> | 8.8-17.6  | <b>16.8</b> | 9.0-24.7  | <b>21.8</b> | 0.0-44.9  |
| Oregon (NPCR)          | 1     | <b>26.8</b> | 22.6-31.1 | <b>25.5</b> | 20.9-30.1 |             |           | <b>34.7</b> | 31.9-37.5 | <b>33.2</b> | 30.2-36.2 | <b>42.1</b> | 26.2-57.9 |
|                        | 3     | <b>10.2</b> | 7.2-13.2  | <b>8.6</b>  | 5.7-11.6  |             |           | <b>15.7</b> | 13.1-18.2 | <b>14.1</b> | 11.3-16.8 | <b>24.3</b> | 8.8-39.8  |
|                        | 5     | <b>6.9</b>  | 4.3-9.5   | <b>5.9</b>  | 3.3-8.5   |             |           | <b>11.2</b> | 8.7-13.8  | <b>10.1</b> | 7.4-12.8  | <b>6.3</b>  | 0.0-15.3  |
| Washington (NPCR)      | 1     | <b>32.2</b> | 29.0-35.4 | <b>31.2</b> | 27.6-34.9 | <b>35.8</b> | 19.9-51.7 | <b>40.3</b> | 38.1-42.5 | <b>36.4</b> | 35.9-40.9 | <b>49.0</b> | 39.4-58.7 |
|                        | 3     | <b>15.3</b> | 12.8-17.8 | <b>13.9</b> | 11.2-16.7 | <b>21.1</b> | 7.4-34.8  | <b>22.1</b> | 20.0-24.2 | <b>20.4</b> | 18.0-22.7 | <b>21.6</b> | 12.5-30.8 |
|                        | 5     | <b>11.8</b> | 9.5-14.1  | <b>10.7</b> | 8.1-13.2  | <b>12.3</b> | 1.6-23.1  | <b>14.7</b> | 12.4-17.0 | <b>13.9</b> | 11.3-16.4 | <b>8.1</b>  | 4.6-11.7  |

Abbreviations: CI, confidence interval; NPCR, National Program of Cancer Registries; NS, net survival; SEER, Surveillance, Epidemiology, and End Results. Unstandardized estimates are italicized.

**SUPPORTING TABLE 3.** Liver Cancer: 5-Year Age-Standardized Net Survival (%) for Adults (15-99 Years Old) Diagnosed 2001-2003 and 2004-2009 by SEER Summary Stage 2000 at Diagnosis, Race, and Calendar Period of Diagnosis

| Location                                      | SEER Summary Stage 2000 | 2001-2003 |           |        |           |        |           | 2004-2009 |           |        |           |        |           |
|-----------------------------------------------|-------------------------|-----------|-----------|--------|-----------|--------|-----------|-----------|-----------|--------|-----------|--------|-----------|
|                                               |                         | All Races |           | Whites |           | Blacks |           | All Races |           | Whites |           | Blacks |           |
|                                               |                         | NS (%)    | 95% CI    | NS (%) | 95% CI    | NS (%) | 95% CI    | NS (%)    | 95% CI    | NS (%) | 95% CI    | NS (%) | 95% CI    |
| <b>UNITED STATES</b>                          | All stages              | 12.2      | 11.8-12.5 | 11.7   | 11.3-12.1 | 9.1    | 8.0-10.2  | 14.8      | 14.4-15.2 | 14.3   | 13.8-14.8 | 11.4   | 10.3-12.5 |
|                                               | Localized               | 23.9      | 22.1-23.8 | 22.4   | 21.4-23.4 | 15.8   | 13.3-18.2 | 25.7      | 24.9-26.5 | 24.8   | 23.9-25.7 | 20.8   | 18.4-23.3 |
|                                               | Regional                | 8.3       | 7.6-9.0   | 7.6    | 6.8-8.4   | 8.3    | 6.3-10.4  | 9.5       | 8.8-10.2  | 9.2    | 8.4-9.9   | 7.1    | 5.4-8.9   |
|                                               | Distant                 | 2.8       | 2.4-3.3   | 2.4    | 2.0-2.9   | 2.5    | 1.2-3.8   | 3.5       | 3.0-4.0   | 2.9    | 2.3-3.4   | 3.8    | 2.6-5.1   |
|                                               | Unknown                 | 8.2       | 7.6-8.9   | 7.9    | 7.2-8.7   | 7.0    | 5.3-8.8   | 8.9       | 8.2-9.6   | 9.0    | 8.1-9.8   | 6.2    | 4.6-7.8   |
|                                               | All stages              | 12.4      | 9.2-15.5  | 12.8   | 9.4-16.2  | 13.5   | 3.4-23.5  | 14.5      | 11.4-17.7 | 14.9   | 11.4-18.5 | 16.1   | 7.7-24.4  |
|                                               | Localized               | 23.6      | 17.0-30.2 | 25.3   | 18.2-32.4 | 8.9    | 0.0-22.0  | 23.7      | 17.2-30.3 | 23.6   | 16.6-30.6 | 22.4   | 6.2-38.6  |
|                                               | Regional                | 7.7       | 3.4-11.9  | 4.3    | 1.3-7.2   | 34.3   | 8.8-59.8  | 8.1       | 4.7-11.5  | 8.8    | 4.8-12.8  | -      | -         |
|                                               | Distant                 | 1.6       | 0.0-3.8   | 0.0    | 0.0-0.0   | 0.0    | 0.0-0.0   | 5.8       | 2.6-9.0   | 4.1    | 0.6-7.6   | 15.1   | 0.5-29.7  |
|                                               | Unknown                 | 8.6       | 3.9-13.2  | 9.6    | 4.5-14.8  | 0.0    | 0.0-0.0   | 9.5       | 6.0-13.1  | 9.3    | 5.7-13.0  | -      | -         |
| Massachusetts (NPCR)                          | All stages              | 14.0      | 11.7-16.4 | 13.1   | 10.6-15.5 | 10.3   | 3.4-17.2  | 15.6      | 13.0-18.2 | 13.6   | 10.9-16.4 | 20.3   | 13.0-27.6 |
|                                               | Localized               | 31.0      | 25.4-36.6 | 28.5   | 22.9-34.0 | 22.2   | 3.7-40.7  | 28.1      | 23.0-33.2 | 26.5   | 21.1-31.9 | 14.6   | 0.0-32.5  |
|                                               | Regional                | 8.0       | 4.6-11.4  | 7.9    | 4.6-11.3  | 9.9    | 0.0-21.0  | 10.5      | 6.7-14.4  | 9.5    | 5.6-13.4  | 9.3    | 0.0-20.2  |
|                                               | Distant                 | 2.6       | 0.5-4.6   | 2.2    | 0.4-4.0   | 0.0    | 0.0-0.0   | 4.7       | 2.4-7.0   | 2.2    | 0.0-4.5   | -      | -         |
|                                               | Unknown                 | 3.8       | 1.4-6.1   | 2.8    | 1.1-4.6   | 0.0    | 0.0-0.0   | 3.9       | 1.8-6.0   | 1.6    | 0.5-2.8   | 10.0   | 0.0-20.9  |
| New Hampshire (NPCR)                          | All stages              | 12.2      | 6.9-17.5  | 10.9   | 5.7-16.1  | 0.0    | 0.0-0.0   | 12.5      | 8.6-16.4  | 12.4   | 8.3-16.4  | -      | -         |
|                                               | Localized               | 32.9      | 16.2-49.5 | 33.7   | 15.8-51.6 | 24.2   | 15.9-32.4 | 24.2      | 15.9-32.4 | 25.6   | 17.2-34.1 | -      | -         |
|                                               | Regional                | 10.1      | 0.2-20.0  | 4.3    | 0.0-10.8  | 0.0    | 0.0-0.0   | 10.0      | 2.6-17.3  | 8.7    | 1.6-15.9  | -      | -         |
|                                               | Distant                 | 0.0       | 0.0-0.0   | 0.0    | 0.0-0.0   | 0.0    | 0.0-0.0   | 0.0       | 0.0-0.0   | 0.0    | 0.0-0.0   | -      | -         |
|                                               | Unknown                 | 2.3       | 0.0-6.1   | 2.5    | 0.0-6.5   | 0.0    | 0.0-0.0   | 3.5       | 0.0-8.5   | 4.0    | 0.0-9.6   | -      | -         |
| Rhode Island (NPCR)                           | All stages              | 12.8      | 7.7-17.8  | 11.7   | 6.8-16.6  | 20.6   | 0.0-42.9  | 10.7      | 6.8-14.7  | 9.9    | 6.1-13.6  | 14.3   | 0.0-31.3  |
|                                               | Localized               | 22.2      | 10.0-34.5 | 19.8   | 7.5-32.1  | 0.0    | 0.0-0.0   | 10.7      | 6.8-14.7  | 9.9    | 6.1-13.6  | -      | -         |
|                                               | Regional                | 11.3      | 2.4-20.3  | 12.5   | 2.7-22.4  | 0.0    | 0.0-0.0   | 10.7      | 6.8-14.7  | 9.9    | 6.1-13.6  | -      | -         |
|                                               | Distant                 | 8.5       | 0.0-18.2  | 5.7    | 0.0-14.2  | 0.0    | 0.0-0.0   | 10.7      | 6.8-14.7  | 9.9    | 6.1-13.6  | -      | -         |
|                                               | Unknown                 | 4.5       | 0.0-10.2  | 4.6    | 0.0-10.4  | 0.0    | 0.0-0.0   | 10.7      | 6.8-14.7  | 9.9    | 6.1-13.6  | -      | -         |
| <b>Mid Atlantic</b><br>New Jersey (NPCR/SEER) | All stages              | 12.6      | 10.7-14.4 | 12.3   | 10.2-14.4 | 6.9    | 3.8-10.0  | 14.8      | 12.8-16.8 | 15.4   | 13.1-17.6 | 8.8    | 4.2-13.4  |
|                                               | Localized               | 23.4      | 19.3-27.4 | 23.0   | 18.3-27.7 | 21.7   | 11.2-32.2 | 23.9      | 20.1-27.6 | 25.0   | 20.8-29.2 | 16.5   | 7.1-25.9  |
|                                               | Regional                | 7.9       | 4.7-11.1  | 9.0    | 5.2-12.8  | 2.5    | 0.0-6.5   | 10.0      | 6.5-13.5  | 9.3    | 5.6-12.9  | 11.2   | 3.3-19.0  |
|                                               | Distant                 | 0.9       | 0.0-1.8   | 1.2    | 0.0-2.5   | 0.0    | 0.0-0.0   | 3.4       | 1.6-5.2   | 4.1    | 2.0-6.2   | 2.2    | 0.0-5.0   |
|                                               | Unknown                 | 12.0      | 8.6-15.3  | 10.2   | 7.0-13.5  | 13.3   | 3.5-23.0  | 11.1      | 7.7-14.5  | 12.0   | 7.9-16.0  | -      | -         |
|                                               | All stages              | 16.8      | 15.5-18.2 | 14.6   | 13.1-16.2 | 13.1   | 9.9-16.4  | 20.4      | 19.1-21.7 | 18.2   | 16.6-19.8 | 16.5   | 13.5-19.5 |
|                                               | Localized               | 32.0      | 28.8-35.2 | 30.3   | 26.5-34.1 | 18.2   | 11.3-25.2 | 34.0      | 31.4-36.7 | 30.2   | 27.0-33.4 | 30.2   | 23.9-36.4 |
|                                               | Regional                | 14.9      | 12.2-17.6 | 11.0   | 8.1-13.8  | 18.5   | 11.7-25.3 | 13.9      | 11.6-16.2 | 13.1   | 10.3-15.9 | 12.2   | 8.0-16.5  |
|                                               | Distant                 | 5.9       | 4.1-7.8   | 4.0    | 2.2-5.8   | 3.3    | 1.3-5.3   | 5.3       | 3.7-6.8   | 4.1    | 2.6-5.6   | 9.1    | 5.3-12.9  |
|                                               | Unknown                 | 10.5      | 8.6-12.4  | 8.7    | 6.5-10.9  | 9.0    | 4.3-13.7  | 13.5      | 11.1-16.0 | 13.6   | 10.8-16.5 | 4.1    | 1.7-6.5   |
| Pennsylvania (NPCR)                           | All stages              | 12.3      | 10.7-13.9 | 12.2   | 10.4-14.0 | 7.9    | 4.8-11.1  | 15.1      | 13.5-16.8 | 14.7   | 12.8-16.5 | 13.4   | 10.2-16.5 |
|                                               | Localized               | 23.5      | 19.9-27.0 | 23.6   | 19.6-27.5 | 9.9    | 5.2-14.5  | 25.4      | 22.1-28.7 | 25.6   | 21.9-29.3 | 23.4   | 16.2-30.6 |
|                                               | Regional                | 7.8       | 5.3-10.3  | 7.2    | 4.5-9.8   | 8.1    | 2.2-14.1  | 8.7       | 6.4-11.1  | 9.4    | 6.6-12.2  | 10.6   | 5.4-15.7  |
|                                               | Distant                 | 1.5       | 0.3-2.6   | 1.3    | 0.0-2.6   | 0.0    | 0.0-0.0   | 5.4       | 3.5-7.2   | 4.5    | 2.7-6.4   | 5.1    | 1.1-9.1   |
|                                               | Unknown                 | 9.2       | 6.2-12.3  | 6.7    | 3.8-9.6   | 8.7    | 2.9-14.5  | 8.0       | 5.2-10.9  | 5.9    | 3.2-8.6   | 11.5   | 2.8-20.2  |

**SUPPORTING TABLE 3. Continued**

| SEER Summary Stage 2000                           | Location   | 2001-2003 |           |        |           |        |          | 2004-2009 |           |        |           |        |           |
|---------------------------------------------------|------------|-----------|-----------|--------|-----------|--------|----------|-----------|-----------|--------|-----------|--------|-----------|
|                                                   |            | All Races |           | Whites |           | Blacks |          | All Races |           | Whites |           | Blacks |           |
|                                                   |            | NS (%)    | 95% CI    | NS (%) | 95% CI    | NS (%) | 95% CI   | NS (%)    | 95% CI    | NS (%) | 95% CI    | NS (%) | 95% CI    |
| <b>SOUTH</b><br>South Atlantic<br>Delaware (NPCR) | All stages | 12.1      | 5.8-18.3  | 13.3   | 6.3-20.3  | 7.6    | 0.0-18.9 | 14.5      | 8.0-21.1  | 13.5   | 7.1-19.9  | 16.8   | 3.0-30.5  |
|                                                   | Localized  | 25.5      | 11.1-39.8 | 27.8   | 11.4-44.2 |        |          | 24.7      | 13.0-36.4 | 17.5   | 9.6-25.3  | 40.5   | 13.6-67.5 |
|                                                   | Regional   | 10.2      | 0.0-22.2  | 15.6   | 0.0-33.5  |        |          | 0.0       | 0.0-0.1   | 9.1    | 0.0-19.0  | 0.7    | 0.0-2.3   |
|                                                   | Distant    | 0.0       |           | 0.0    |           |        |          |           |           |        |           |        |           |
|                                                   | Unknown    | 0.0       |           | 0.0    |           |        |          |           |           |        |           |        |           |
|                                                   | All stages | 14.8      | 13.3-16.2 | 14.5   | 12.9-16.1 | 14.3   | 9.0-19.6 | 20.9      | 19.3-22.4 | 20.8   | 19.1-22.6 | 17.4   | 13.7-21.1 |
|                                                   | Localized  | 26.4      | 23.0-29.7 | 26.8   | 23.2-30.4 | 14.8   | 6.6-22.9 | 32.8      | 29.9-35.6 | 32.7   | 29.7-35.7 | 30.3   | 22.3-38.3 |
|                                                   | Regional   | 10.7      | 7.9-13.5  | 9.4    | 6.6-12.2  | 15.8   | 6.7-24.8 | 14.8      | 11.8-17.7 | 14.5   | 11.3-17.8 | 9.5    | 4.9-14.1  |
|                                                   | Distant    | 5.5       | 3.4-7.5   | 4.7    | 2.7-6.7   | 6.9    | 0.7-13.1 | 8.1       | 5.8-10.4  | 7.0    | 4.6-9.3   | 9.7    | 3.3-16.1  |
|                                                   | Unknown    | 12.5      | 10.1-15.0 | 12.4   | 9.7-15.0  | 14.4   | 6.5-22.3 | 16.3      | 13.3-19.2 | 16.4   | 13.0-19.7 | 11.2   | 6.0-16.5  |
| Georgia<br>(NPCR/SEER)                            | All stages | 7.6       | 5.6-9.6   | 8.2    | 5.7-10.6  | 4.5    | 1.7-7.2  | 12.5      | 10.4-14.6 | 13.3   | 10.8-15.7 | 10.9   | 6.3-15.4  |
|                                                   | Localized  | 16.5      | 11.9-21.2 | 19.4   | 13.7-25.1 | 6.9    | 1.5-12.2 | 22.7      | 18.6-26.9 | 22.7   | 18.0-27.3 | 24.4   | 15.3-33.6 |
|                                                   | Regional   | 2.4       | 0.0-4.9   | 2.6    | 0.0-5.9   | 2.0    | 0.0-5.2  | 6.4       | 3.7-9.2   | 8.3    | 4.8-11.8  | 4.4    | 1.7-7.0   |
|                                                   | Distant    | 0.0       | 0.0-0.0   | 0.0    | 0.0-0.0   | 0.1    | 0.0-0.3  | 4.1       | 1.8-6.4   | 5.0    | 2.1-7.8   | 3.3    | 0.0-6.8   |
|                                                   | Unknown    | 5.5       | 2.5-8.5   | 3.2    | 1.0-5.3   | 9.2    | 0.5-17.8 | 8.4       | 4.6-12.2  | 8.0    | 4.1-11.9  | 8.7    | 0.0-18.1  |
| Maryland (NPCR)                                   | All stages | 10.7      | 8.1-13.3  | 9.7    | 6.7-12.7  | 10.8   | 6.1-15.5 | 13.4      | 10.8-16.0 | 13.5   | 10.6-16.5 | 8.9    | 5.0-12.7  |
|                                                   | Localized  |           |           |        |           |        |          |           |           |        |           |        |           |
|                                                   | Regional   |           |           |        |           |        |          |           |           |        |           |        |           |
|                                                   | Distant    |           |           |        |           |        |          |           |           |        |           |        |           |
|                                                   | Unknown    |           |           |        |           |        |          |           |           |        |           |        |           |
| North Carolina<br>(NPCR)                          | All stages | 10.2      | 8.1-12.4  | 10.7   | 8.2-13.2  | 5.7    | 2.8-8.6  | 12.0      | 9.9-14.1  | 13.3   | 10.8-15.9 | 5.9    | 2.5-9.3   |
|                                                   | Localized  | 17.5      | 13.1-21.8 | 17.6   | 12.7-22.5 | 9.7    | 3.3-16.2 | 21.7      | 17.2-26.2 | 25.3   | 19.9-30.6 | 6.4    | 3.0-9.9   |
|                                                   | Regional   | 6.7       | 3.2-10.1  | 5.1    | 1.8-8.4   | 11.9   | 2.6-21.7 | 6.2       | 3.5-8.9   | 6.0    | 3.0-9.0   | 3.2    | 0.0-7.3   |
|                                                   | Distant    | 2.7       | 0.8-4.6   | 3.3    | 1.1-5.4   | 0.0    |          | 3.4       | 1.2-5.6   | 3.1    | 0.9-5.2   |        |           |
|                                                   | Unknown    | 7.4       | 3.9-10.8  | 8.0    | 4.1-12.0  | 1.9    | 0.3-3.6  | 6.0       | 2.9-9.0   | 4.6    | 2.1-7.2   | 10.3   | 2.2-18.5  |
| South Carolina<br>(NPCR)                          | All stages | 10.0      | 7.2-12.7  | 11.6   | 8.2-15.1  | 6.7    | 2.2-11.1 | 10.4      | 7.7-13.1  | 11.9   | 8.5-15.2  | 6.5    | 2.5-10.4  |
|                                                   | Localized  | 18.2      | 12.7-23.7 | 20.0   | 13.4-26.5 | 12.7   | 1.3-24.2 | 20.8      | 15.4-26.2 | 24.5   | 18.2-30.9 | 13.5   | 5.1-21.9  |
|                                                   | Regional   | 7.9       | 3.1-12.8  | 10.6   | 4.5-16.7  | 5.4    | 0.0-13.8 | 4.3       | 1.4-7.1   | 3.8    | 0.0-7.8   | 0.1    | 0.0-0.2   |
|                                                   | Distant    | 0.0       |           | 0.0    |           | 0.0    |          | 3.5       | 0.1-6.8   | 5.2    | 0.3-10.1  |        |           |
|                                                   | Unknown    | 4.8       | 1.9-7.8   | 4.2    | 1.0-7.4   | 7.6    | 0.0-15.5 | 6.0       | 2.8-9.2   | 5.3    | 0.4-10.2  | 6.0    | 0.0-13.4  |
| West Virginia<br>(NPCR)                           | All stages | 6.3       | 3.1-9.5   | 6.6    | 3.3-10.0  |        |          | 9.2       | 5.4-13.1  | 7.9    | 4.5-11.4  |        |           |
|                                                   | Localized  | 11.5      | 2.9-20.1  | 11.9   | 3.0-20.8  |        |          | 16.2      | 8.7-23.7  | 16.9   | 9.1-24.7  |        |           |
|                                                   | Regional   | 15.6      | 3.6-27.6  | 16.1   | 3.8-28.3  |        |          | 15.2      | 6.0-24.5  | 15.2   | 5.9-24.5  |        |           |
|                                                   | Distant    | 3.0       | 0.0-7.4   | 3.1    | 0.0-7.7   |        |          | 8.3       | 1.5-15.1  | 9.0    | 1.7-16.3  |        |           |
|                                                   | Unknown    | 0.0       |           | 0.0    |           |        |          | 2.2       | 0.0-5.5   | 2.0    | 0.0-5.0   |        |           |
| <b>East South Central</b><br>Alabama (NPCR)       | All stages | 8.3       | 5.6-10.9  | 7.3    | 4.5-10.0  | 7.8    | 3.3-12.3 | 9.8       | 7.3-12.3  | 11.4   | 8.2-14.6  | 4.5    | 1.4-7.7   |
|                                                   | Localized  | 15.1      | 9.7-20.5  | 13.2   | 7.5-18.9  | 24.2   | 9.9-38.6 | 19.7      | 15.4-24.0 | 20.3   | 15.9-24.6 | 13.9   | 4.1-23.8  |
|                                                   | Regional   | 5.3       | 1.3-9.2   | 5.5    | 1.0-10.0  | 4.3    | 0.0-11.0 | 3.4       | 1.2-5.6   | 5.5    | 2.6-8.5   | 0.1    | 0.0-0.3   |
|                                                   | Distant    | 3.4       | 0.0-7.9   | 1.1    | 0.0-2.4   | 0.0    |          | 2.8       | 0.0-5.7   | 3.2    | 0.1-6.3   | 0.3    | 0.0-0.9   |
|                                                   | Unknown    | 4.7       | 1.5-7.9   | 4.0    | 0.8-7.1   | 6.0    | 0.0-13.0 | 2.8       | 0.5-5.1   | 3.8    | 1.0-6.5   | 0.1    | 0.0-0.3   |

**SUPPORTING TABLE 3. Continued**

| SEER Summary Stage 2000                    | Location   | 2001-2003 |           |        |           |        |          | 2004-2009 |           |        |           |        |           |
|--------------------------------------------|------------|-----------|-----------|--------|-----------|--------|----------|-----------|-----------|--------|-----------|--------|-----------|
|                                            |            | All Races |           | Whites |           | Blacks |          | All Races |           | Whites |           | Blacks |           |
|                                            |            | NS (%)    | 95% CI    | NS (%) | 95% CI    | NS (%) | 95% CI   | NS (%)    | 95% CI    | NS (%) | 95% CI    | NS (%) | 95% CI    |
| Kentucky (NPCR/SEER)                       | All stages | 10.3      | 7.4-13.2  | 10.3   | 7.3-13.3  | 11.9   | 1.8-21.9 | 11.2      | 8.5-14.0  | 11.6   | 8.6-14.5  | 9.8    | 1.8-17.8  |
|                                            | Localized  | 21.9      | 15.7-28.2 | 21.8   | 15.4-28.2 | 24.2   | 2.8-45.6 | 18.8      | 13.7-24.0 | 20.0   | 15.0-25.1 | 16.5   | 1.6-31.4  |
|                                            | Regional   | 2.2       | 0.0-4.5   | 1.4    | 0.0-3.6   | 8.3    | 0.0-20.9 | 10.6      | 6.5-14.6  | 11.6   | 7.3-16.0  | 6.4    | 0.0-14.1  |
|                                            | Distant    | 0.0       | 0.0-0.0   | 0.0    | 0.0-0.0   | 0.0    | 0.0-0.0  | 2.1       | 0.3-3.9   | 1.8    | 0.0-4.3   | 6.4    | 0.0-14.1  |
|                                            | Unknown    | 6.2       | 3.3-9.2   | 7.0    | 3.8-10.2  | 3.7    | 0.0-9.3  | 4.4       | 1.5-7.3   | 2.9    | 0.5-5.4   | 8.6    | 3.6-13.5  |
|                                            | All stages | 7.1       | 2.6-11.6  | 8.0    | 2.8-13.2  | 10.4   | 0.0-25.6 | 11.3      | 8.0-14.6  | 13.5   | 9.6-17.4  | 19.2   | 5.5-32.8  |
| Mississippi (NPCR)                         | Localized  | 12.1      | 2.3-21.9  | 13.3   | 1.5-25.1  | 0.0    | 0.0-0.0  | 23.3      | 16.7-29.8 | 24.7   | 17.2-32.2 | 4.8    | 0.0-10.8  |
|                                            | Regional   | 12.2      | 0.2-24.2  | 11.8   | 0.0-25.5  | 0.0    | 0.0-0.0  | 5.1       | 1.0-9.2   | 3.7    | 0.0-8.0   | 4.8    | 0.0-10.8  |
|                                            | Distant    | 0.0       | 0.0-0.0   | 0.0    | 0.0-0.0   | 0.0    | 0.0-0.0  | 3.8       | 0.2-7.5   | 5.2    | 0.4-9.9   | 16.0   | 2.0-30.0  |
|                                            | Unknown    | 0.0       | 0.0-0.0   | 0.0    | 0.0-0.0   | 0.0    | 0.0-0.0  | 3.7       | 0.0-8.5   | 3.2    | 0.0-7.8   | 16.0   | 2.0-30.0  |
|                                            | All stages | 8.2       | 4.6-11.7  | 10.0   | 5.9-14.1  | 0.0    | 0.0-0.0  | 11.5      | 9.0-13.9  | 10.7   | 8.2-13.2  | 12.0   | 5.9-18.1  |
|                                            | Localized  | 14.6      | 7.8-21.3  | 19.0   | 9.0-29.0  | 0.0    | 0.0-0.0  | 20.4      | 15.8-25.0 | 18.6   | 13.9-23.4 | 24.2   | 12.9-35.5 |
| Tennessee (NPCR)                           | Regional   | 5.4       | 0.0-11.8  | 6.0    | 0.0-13.1  | 3.3    | 0.0-8.5  | 6.6       | 3.7-9.6   | 7.5    | 3.9-11.1  | 0.2    | 0.0-0.7   |
|                                            | Distant    | 3.5       | 0.0-8.8   | 4.3    | 0.0-10.8  | 13.2   | 1.8-24.5 | 0.0       | 0.0-0.1   | 0.0    | 0.0-0.1   | 5.8    | 0.0-12.5  |
|                                            | Unknown    | 3.3       | 0.0-8.4   | 4.0    | 0.0-10.0  | 0.0    | 0.0-0.0  | 6.2       | 2.7-9.8   | 3.9    | 0.5-7.3   | 0.3    | 0.0-1.0   |
|                                            | All stages | 9.1       | 6.8-11.4  | 11.9   | 8.9-15.0  | 5.0    | 2.1-7.9  | 9.3       | 7.1-11.6  | 11.1   | 8.1-14.0  | 6.8    | 3.4-10.2  |
|                                            | Localized  | 17.9      | 13.2-22.7 | 21.8   | 16.0-27.6 | 11.4   | 4.2-18.7 | 15.1      | 11.2-19.0 | 17.8   | 12.8-22.8 | 11.2   | 5.4-17.0  |
|                                            | Regional   | 4.1       | 1.3-7.0   | 4.9    | 1.2-8.5   | 1.9    | 0.0-4.9  | 6.2       | 3.4-8.9   | 8.4    | 4.8-12.0  | 2.5    | 0.0-5.3   |
| West South Central Louisiana (NPCR/SEER)   | Distant    | 0.0       | 0.0-0.0   | 0.0    | 0.0-0.0   | 0.0    | 0.0-0.0  | 2.3       | 0.6-4.0   | 0.0    | 0.0-0.0   | 4.4    | 0.1-8.7   |
|                                            | Unknown    | 5.0       | 1.2-8.8   | 4.2    | 0.0-8.5   | 3.3    | 0.0-8.5  | 5.3       | 1.0-9.7   | 6.0    | 0.4-11.7  | 4.2    | 0.0-9.3   |
|                                            | All stages | 8.1       | 5.4-10.8  | 6.9    | 4.0-9.8   | 13.2   | 1.8-24.5 | 10.9      | 8.0-13.9  | 11.1   | 8.1-14.2  | 23.7   | 12.6-34.8 |
|                                            | Localized  | 15.6      | 10.1-21.2 | 12.8   | 7.4-18.1  | 0.0    | 0.0-0.0  | 17.3      | 11.7-22.8 | 18.6   | 12.9-24.3 | 22.8   | 0.0-46.4  |
|                                            | Regional   | 3.8       | 0.0-8.2   | 2.5    | 0.0-6.4   | 0.0    | 0.0-0.0  | 3.5       | 0.6-6.5   | 5.0    | 1.3-8.8   | 8.7    | 0.0-21.1  |
|                                            | Distant    | 1.2       | 0.0-3.0   | 0.0    | 0.0-0.0   | 0.0    | 0.0-0.0  | 3.7       | 0.4-7.0   | 3.7    | 0.4-6.9   | 13.1   | 0.0-27.0  |
| Texas (NPCR)                               | Unknown    | 7.2       | 3.5-11.0  | 6.3    | 1.3-11.3  | 13.8   | 0.0-29.5 | 11.0      | 7.3-14.6  | 9.9    | 6.2-13.7  | 27.3   | 5.8-48.7  |
|                                            | All stages | 12.0      | 10.9-13.2 | 11.9   | 10.6-13.2 | 10.0   | 6.0-14.1 | 14.1      | 12.9-15.3 | 14.3   | 12.9-15.6 | 8.0    | 5.8-10.3  |
|                                            | Localized  | 19.5      | 17.0-22.0 | 19.0   | 16.3-21.7 | 16.3   | 9.3-23.3 | 22.6      | 20.3-24.9 | 22.2   | 19.7-24.7 | 15.1   | 10.0-20.1 |
|                                            | Regional   | 7.5       | 5.3-9.8   | 6.6    | 4.3-8.9   | 7.9    | 1.3-14.5 | 7.9       | 5.8-10.0  | 8.4    | 6.1-10.7  | 3.7    | 1.1-6.3   |
|                                            | Distant    | 3.7       | 2.2-5.2   | 3.7    | 2.1-5.4   | 2.3    | 0.2-4.3  | 3.0       | 1.9-4.2   | 3.1    | 1.8-4.3   | 4.4    | 1.4-7.4   |
|                                            | Unknown    | 11.4      | 9.4-13.4  | 11.0   | 8.9-13.1  | 8.0    | 2.0-14.0 | 12.2      | 10.0-14.4 | 12.6   | 10.2-15.0 | 10.2   | 6.4-13.9  |
| MIDWEST East North Central Michigan (NPCR) | All stages | 11.0      | 9.2-12.8  | 11.6   | 9.5-13.7  | 7.9    | 4.3-11.5 | 15.2      | 13.3-17.1 | 16.4   | 14.2-18.6 | 6.1    | 4.1-8.0   |
|                                            | Localized  | 23.9      | 19.3-28.4 | 24.5   | 19.4-29.5 | 14.2   | 6.2-22.1 | 26.7      | 22.2-31.2 | 28.3   | 23.4-33.2 | 13.5   | 9.3-17.8  |
|                                            | Regional   | 7.2       | 4.3-10.2  | 7.9    | 4.7-11.0  | 9.1    | 1.8-16.4 | 16.2      | 11.7-20.7 | 16.3   | 11.1-21.5 | 9.6    | 1.4-17.8  |
|                                            | Distant    | 1.6       | 0.3-2.8   | 1.7    | 0.3-3.1   | 3.1    | 0.0-6.9  | 5.7       | 3.5-7.9   | 5.4    | 3.0-7.7   | 2.5    | 0.0-5.6   |
|                                            | Unknown    | 6.1       | 3.8-8.5   | 4.7    | 2.7-6.7   | 6.9    | 0.6-13.3 | 7.9       | 5.7-10.1  | 8.9    | 6.2-11.5  | 4.0    | 0.1-7.9   |
|                                            | All stages | 9.1       | 7.4-10.8  | 10.3   | 8.1-12.3  | 4.7    | 2.1-7.3  | 12.7      | 10.8-14.5 | 12.2   | 10.2-14.3 | 13.9   | 10.0-17.7 |
| Ohio (NPCR)                                | Localized  | 17.9      | 13.8-22.0 | 18.8   | 14.1-23.5 | 15.0   | 5.6-24.3 | 28.9      | 24.6-33.1 | 29.0   | 24.2-33.7 | 28.2   | 19.6-36.7 |
|                                            | Regional   | 5.6       | 3.0-8.2   | 6.9    | 3.6-10.3  | 5.6    | 0.0-12.3 | 8.3       | 5.6-11.0  | 8.9    | 5.7-12.1  | 12.1   | 5.8-18.4  |
|                                            | Distant    | 1.7       | 0.4-3.1   | 1.9    | 0.3-3.4   | 0.0    | 0.0-0.0  | 3.3       | 1.2-5.3   | 2.9    | 1.1-4.8   | 5.3    | 0.0-10.7  |
|                                            | Unknown    | 6.5       | 4.1-8.9   | 8.2    | 5.5-10.9  | 3.0    | 0.0-6.5  | 2.9       | 1.3-4.5   | 2.3    | 0.8-3.7   | 2.0    | 0.3-3.8   |

**SUPPORTING TABLE 3. Continued**

| Location                       | SEER Summary Stage 2000 | 2001-2003 |           |         |           |        |          | 2004-2009 |           |          |           |        |           |
|--------------------------------|-------------------------|-----------|-----------|---------|-----------|--------|----------|-----------|-----------|----------|-----------|--------|-----------|
|                                |                         | All Races |           | Whites  |           | Blacks |          | All Races |           | Whites   |           | Blacks |           |
|                                |                         | NS (%)    | 95% CI    | NS (%)  | 95% CI    | NS (%) | 95% CI   | NS (%)    | 95% CI    | NS (%)   | 95% CI    | NS (%) | 95% CI    |
| Wisconsin (NPCR)               | All stages              | 13.9      | 10.9-16.9 | 14.0    | 10.8-17.2 | 13.9   | 4.0-23.9 | 11.5      | 9.0-14.1  | 12.0     | 9.2-14.7  | 10.1   | 1.6-18.6  |
|                                | Localized               |           |           |         |           |        |          |           |           |          |           |        |           |
|                                | Regional                |           |           |         |           |        |          |           |           |          |           |        |           |
|                                | Distant                 |           |           |         |           |        |          |           |           |          |           |        |           |
| West North Central Iowa (SEER) | All stages              | 12.0      | 8.3-15.7  | 12.6    | 8.9-16.3  |        |          | 16.5      | 12.9-20.1 | 17.7     | 13.9-21.5 | 19.9   | 2.2-37.5  |
|                                | Localized               | 31.9      | 23.8-40.0 | 32.8    | 24.3-41.3 |        |          | 38.7      | 30.9-46.5 | 40.4     | 32.6-48.2 |        |           |
|                                | Regional                | 1.2       | 0.0-3.0   | 1.2     | 0.0-3.0   |        |          | 9.1       | 5.3-12.8  | 9.9      | 6.0-13.7  |        |           |
|                                | Distant                 | 1.8       | 0.0-4.9   | 2.0     | 0.0-5.3   |        |          | 1.3       | 0.0-3.2   |          |           |        |           |
| Nebraska (NPCR)                | All stages              | 12.7      | 8.5-16.9  | 12.6    | 8.1-17.0  | 23.7   | 0.0-48.2 | 14.9      | 11.3-18.5 | 15.3     | 11.5-19.1 | 19.0   | 5.5-32.5  |
|                                | Localized               | 23.7      | 15.3-32.1 | 23.5    | 14.4-32.6 |        |          | 26.5      | 19.5-33.5 | 25.7     | 18.6-32.8 | 52.8   | 17.3-88.3 |
|                                | Regional                | 12.5      | 3.4-21.6  | 14.4    | 3.9-24.8  |        |          | 12.2      | 7.5-16.9  | 14.1     | 7.0-21.1  | 15.5   | 0.0-32.8  |
|                                | Distant                 | 3.6       | 0.0-8.8   | 0.0     |           |        |          |           |           |          |           |        |           |
| Unknown                        | 4.5                     | 0.0-9.1   | 4.7       | 0.0-9.5 |           |        | 6.9      | 0.7-13.0  | 7.5       | 0.8-14.2 |           |        |           |
| WEST Mountain Colorado (NPCR)  | All stages              | 11.5      | 8.7-14.3  | 11.3    | 8.3-14.4  | 6.9    | 0.0-15.0 | 16.0      | 13.2-18.9 | 15.6     | 12.6-18.6 | 11.0   | 1.5-20.5  |
|                                | Localized               | 20.5      | 15.1-25.9 | 20.4    | 14.7-26.2 |        |          | 28.2      | 22.3-34.1 | 27.0     | 20.9-33.2 | 19.0   | 0.8-37.3  |
|                                | Regional                | 7.7       | 3.5-12.0  | 7.6     | 3.1-12.1  | 0.0    |          | 6.4       | 3.2-9.6   | 5.9      | 2.7-9.0   | 15.2   | 0.0-34.1  |
|                                | Distant                 | 3.6       | 0.7-6.4   | 0.6     | 0.0-1.3   |        |          | 3.0       | 0.2-5.9   | 3.2      | 0.2-6.1   |        |           |
| Idaho (NPCR)                   | All stages              | 15.4      | 8.1-22.6  | 15.2    | 7.7-22.7  |        |          | 8.9       | 4.9-13.0  | 8.4      | 4.3-12.4  |        |           |
|                                | Localized               | 37.0      | 18.1-56.0 | 36.1    | 16.5-55.6 |        |          | 11.5      | 6.5-16.4  | 11.8     | 6.6-17.1  |        |           |
|                                | Regional                | 4.0       | 0.0-10.0  | 4.0     | 0.0-10.0  |        |          | 22.1      | 12.0-32.2 | 23.1     | 12.4-33.7 |        |           |
|                                | Distant                 | 6.7       | 0.0-16.7  | 7.6     | 0.0-18.8  |        |          | 6.9       | 0.0-15.1  | 6.9      | 0.0-15.1  |        |           |
| Montana (NPCR)                 | All stages              | 6.0       | 0.0-15.3  | 6.0     | 0.0-15.3  |        |          | 7.0       | 0.0-3.4   | 1.0      | 0.0-3.2   |        |           |
|                                | Localized               | 13.9      | 5.7-22.1  | 13.9    | 5.2-22.7  |        |          | 0.7       | 0.0-2.3   | 0.9      | 0.0-2.7   |        |           |
|                                | Regional                | 27.3      | 7.9-46.7  | 32.1    | 10.0-54.3 |        |          | 11.1      | 5.5-16.6  | 11.8     | 5.9-17.8  |        |           |
|                                | Distant                 | 6.8       | 0.0-16.6  | 7.6     | 0.0-18.6  |        |          | 16.4      | 6.1-26.8  | 16.4     | 5.8-26.9  |        |           |
| New Mexico (SEER)              | All stages              | 13.0      | 0.6-25.4  | 10.1    | 0.0-21.7  |        |          | 8.1       | 0.0-16.2  | 8.8      | 0.0-17.9  |        |           |
|                                | Localized               | 7.0       | 4.3-9.7   | 6.9     | 4.0-9.7   |        |          | 21.3      | 2.2-40.4  | 20.8     | 0.6-41.1  |        |           |
|                                | Regional                | 11.5      | 6.5-16.4  | 11.6    | 6.3-16.9  |        |          | 9.7       | 7.1-12.4  | 9.9      | 7.0-12.9  |        |           |
|                                | Distant                 | 2.3       | 0.0-5.6   | 0.0     |           |        |          | 17.0      | 11.6-22.3 | 15.9     | 10.6-21.3 |        |           |
| Utah (SEER)                    | All stages              | 4.8       | 0.8-8.9   | 4.9     | 0.9-8.9   |        |          | 5.5       | 1.3-9.6   | 4.6      | 0.5-8.7   |        |           |
|                                | Localized               | 3.0       | 0.0-6.2   | 3.3     | 0.0-6.8   |        |          | 6.8       | 2.4-11.2  | 6.6      | 1.9-11.3  |        |           |
|                                | Regional                | 11.4      | 6.5-16.3  | 11.7    | 6.5-17.0  |        |          | 9.8       | 5.9-13.7  | 10.7     | 6.4-15.0  |        |           |
|                                | Distant                 | 16.8      | 9.6-24.1  | 18.8    | 10.5-27.2 |        |          | 23.9      | 17.3-30.5 | 23.0     | 16.1-29.8 |        |           |
| Unknown                        | 0.0                     |           | 0.0       |         |           |        | 2.9      | 0.0-7.4   | 3.4       | 0.0-8.8  |           |        |           |
|                                |                         |           |           |         |           |        | 1.0      | 0.0-3.4   | 1.2       | 0.0-4.0  |           |        |           |
|                                |                         |           |           |         |           |        | 0.0      |           | 0.0       |          |           |        |           |
|                                |                         |           |           |         |           |        | 6.1      | 0.0-15.4  |           |          |           |        |           |

**SUPPORTING TABLE 3. Continued**

| Location                  | SEER Summary Stage 2000 | 2001-2003 |           |         |           |        |          | 2004-2009 |           |         |           |        |           |
|---------------------------|-------------------------|-----------|-----------|---------|-----------|--------|----------|-----------|-----------|---------|-----------|--------|-----------|
|                           |                         | All Races |           | Whites  |           | Blacks |          | All Races |           | Whites  |           | Blacks |           |
|                           |                         | NS (%)    | 95% CI    | NS (%)  | 95% CI    | NS (%) | 95% CI   | NS (%)    | 95% CI    | NS (%)  | 95% CI    | NS (%) | 95% CI    |
| Wyoming (NPCR)            | All stages              | 2.7       | 0.0-7.0   | 3.0     | 0.0-7.6   |        |          | 8.1       | 2.2-13.9  | 8.1     | 2.3-14.0  |        |           |
|                           | Localized               |           |           |         |           |        |          | 15.9      | 5.3-26.6  | 15.7    | 5.2-26.3  |        |           |
|                           | Regional                |           |           |         |           |        |          |           |           |         |           |        |           |
|                           | Unknown                 | 0.0       |           | 0.0     |           |        |          | 6.5       | 0.0-15.9  | 6.8     | 0.0-16.6  |        |           |
| Pacific<br>Alaska (NPCR)  | All stages              | 9.0       | 3.9-14.0  | 9.8     | 2.6-17.0  |        |          | 16.6      | 9.4-23.7  | 13.1    | 6.9-19.4  |        |           |
|                           | Localized               | 26.1      | 10.1-42.0 | 22.0    | 2.0-42.0  |        |          | 34.8      | 20.4-49.2 | 46.1    | 29.1-63.2 |        |           |
|                           | Regional                | 4.6       | 0.0-11.6  | 7.8     | 0.0-19.4  |        |          | 3.0       | 0.0-7.5   | 4.8     | 0.0-12.0  |        |           |
|                           | Distant                 | 5.6       | 0.0-14.1  | 10.0    | 0.0-24.6  |        |          | 0.0       | 0.0-0.0   | 0.1     | 0.0-0.5   |        |           |
| California<br>(NPCR/SEER) | Unknown                 | 7.5       | 0.0-16.2  | 4.1     | 0.0-10.4  |        |          | 10.0      | 0.0-21.9  | 0.0     | 0.0-0.0   |        |           |
|                           | All stages              | 11.4      | 10.6-12.3 | 10.1    | 9.1-11.1  | 7.2    | 5.1-9.3  | 14.8      | 13.8-15.8 | 12.8    | 11.7-13.9 | 11.7   | 8.5-14.9  |
|                           | Localized               | 21.8      | 20.0-23.6 | 18.9    | 16.8-20.9 | 13.9   | 9.1-18.7 | 26.1      | 24.1-28.0 | 22.6    | 20.4-24.8 | 25.1   | 19.0-31.3 |
|                           | Regional                | 7.8       | 6.4-9.2   | 7.5     | 5.7-9.3   | 5.0    | 2.1-7.8  | 10.1      | 8.6-11.6  | 8.8     | 7.1-10.4  | 5.9    | 2.3-9.5   |
| Hawaii (SEER)             | Distant                 | 1.9       | 1.1-2.6   | 1.8     | 0.9-2.8   | 3.4    | 0.0-7.0  | 1.7       | 1.0-2.4   | 1.4     | 0.7-2.1   | 3.3    | 0.7-5.9   |
|                           | Unknown                 | 3.8       | 2.5-5.1   | 3.9     | 2.3-5.5   | 1.1    | 0.0-2.4  | 5.8       | 4.2-7.3   | 5.5     | 3.7-7.3   | 4.4    | 0.0-10.3  |
|                           | All stages              | 15.2      | 11.3-19.1 | 19.8    | 8.4-31.1  |        |          | 13.2      | 8.8-17.6  | 16.8    | 9.0-24.7  | 21.8   | 0.0-44.9  |
|                           | Localized               | 31.4      | 23.9-38.9 | 43.2    | 21.5-65.0 |        |          | 27.0      | 18.7-35.3 | 31.4    | 11.1-51.6 |        |           |
| Oregon (NPCR)             | Regional                | 6.9       | 2.7-11.2  | 5.9     | 0.0-14.9  |        |          | 4.5       | 0.0-10.0  | 11.6    | 1.4-21.8  |        |           |
|                           | Distant                 | 1.0       | 0.0-2.1   |         |           |        |          | 1.4       | 0.0-3.4   | 5.4     | 0.0-12.7  |        |           |
|                           | Unknown                 | 0.0       |           |         |           |        |          | 0.1       | 0.0-0.3   | 7.5     | 0.0-18.2  |        |           |
|                           | All stages              | 6.9       | 4.3-9.5   | 5.9     | 3.3-8.5   |        |          | 11.2      | 8.7-13.8  | 10.1    | 7.4-12.8  | 6.3    | 0.0-15.3  |
| Washington (NPCR)         | Localized               | 13.4      | 6.8-20.0  | 10.5    | 4.2-16.8  |        |          | 22.8      | 16.9-28.7 | 20.0    | 14.0-26.0 | 0.0    | 0.0-0.1   |
|                           | Regional                | 8.0       | 2.6-13.3  | 10.1    | 3.5-16.8  |        |          | 7.9       | 4.5-11.3  | 7.2     | 3.6-10.7  | 0.1    | 0.0-0.2   |
|                           | Distant                 | 1.9       | 0.0-4.0   | 2.2     | 0.0-4.5   |        |          | 2.8       | 0.1-5.4   | 3.9     | 0.7-7.0   |        |           |
|                           | Unknown                 | 3.6       | 0.7-6.5   | 2.0     | 0.0-4.1   |        |          | 4.2       | 0.5-8.0   | 3.7     | 0.4-7.0   |        |           |
| Washington (NPCR)         | All stages              | 11.8      | 9.5-14.1  | 10.7    | 8.1-13.2  | 12.3   | 1.6-23.1 | 14.7      | 12.4-17.0 | 13.9    | 11.3-16.4 | 8.1    | 4.6-11.7  |
|                           | Localized               | 23.9      | 18.9-28.8 | 24.4    | 18.7-30.1 | 22.9   | 1.7-44.0 | 28.1      | 23.1-33.0 | 28.2    | 22.7-33.7 | 13.2   | 0.0-27.5  |
|                           | Regional                | 6.4       | 3.5-9.4   | 4.1     | 1.5-6.6   | 6.8    | 0.0-17.0 | 7.4       | 4.8-10.1  | 5.3     | 2.9-7.8   | 5.5    | 0.0-12.9  |
|                           | Distant                 | 1.9       | 0.3-3.6   | 1.6     | 0.1-3.1   |        |          | 0.9       | 0.0-2.2   | 1.2     | 0.0-2.7   |        |           |
| Unknown                   | 1.5                     | 0.0-3.0   | 1.8       | 0.0-3.6 |           |        | 5.6      | 2.4-8.9   | 5.1       | 1.7-8.5 |           |        |           |

Abbreviations: CI, confidence interval; NPCR, National Program of Cancer Registries; NS, net survival; SEER, Surveillance, Epidemiology, and End Results. Information on stage was not available for 2 states (Maryland and Wisconsin) or for Rhode Island for cases diagnosed during 2004-2009. Unstandardized estimates are italicized.
